# Supplementary material for: A Simulation Study for Trimetallic Nanosized Alloy (Ni, Cu, and Ag) in Hydrogenation of Organic Compounds: A Case Study of “Nitrophenols”
Source: Hindawi journal article supplement (doi:10.1155/2017/9464209), 2017-01-01
Supplement: f1 [file 9464209.f1.xlsx]

## Sheet: Sheet1
mole ratio				Wt% ratio															simulated linear				real syn	real correction	real correction2	real syn	real cat reponse	time	time (min)		simulated particle size
Ni	Cu	Ag		Ni%	%Cu	%Ag	time (sec)	time(min)	catlytic activity response	linear catalytioc activity response per unit nickel	%syn	%Syn/Ni		simulated Syn of Cu	simulated syn of Ag	corrected simulated cu	corrected simulated Ag	linear addition syn(Cu,Ag)	time(sec)	time(min)		simulated function 3 dimensional
1	0	0		100	0	0	506	8.43333	0.00197628	1.97628e-05	0	0		-0.0426081	8.3808e-12	0	0	0	506	8.43333		0.00177524	0	0.794544	0.00177524	0.177524	0.00197979	505.103	8.41839
1	1	1		25.6108	27.7051	46.6841	240	4	0.00416667		723.22	28.2388		6.78646	11.8881	6.78646	11.8881	18.6745	1664.83	27.7471		18.2424	28.2388	24.1834	24.1834	619.357	0.00364097	274.652	4.57753
2	1	0		64.8977	35.1023	0	150	2.5	0.00666667		419.792	6.46852		6.41981	8.3808e-12	6.41981	0	6.41981	732.653	12.2109		6.75292	6.46852	7.93586	6.75292	438.249	0.00690339	144.856	2.41427
2	0	1		52.3173	0	47.6827	140	2.33333	0.00714286		590.84	11.2934		-0.0426081	11.3036	0	11.3036	11.3036	868.953	14.4825		11.7134	11.2934	13.2309	11.7134	612.814	0.00737006	135.684	2.2614
1	1	0		48.036	51.964	0	452	7.53333	0.00221239		133.048	2.76975		2.81221	8.3808e-12	2.81221	0	2.81221	1024.56	17.0761		3.07186	2.76975	4.76806	3.07186	147.56	0.00235015	425.504	7.09173
1	0	1		35.4255	0	64.5745	598	9.96667	0.00167224		138.855	3.91963		-0.0426081	3.92475	0	3.92475	3.92475	1374.41	22.9068		4.43788	3.91963	7.18082	7.18082	254.384	0.00248107	403.052	6.71753
1	2	0		31.6101	68.3899	0	1100	18.3333	0.000909091		45.523	1.44014		1.34514	8.3808e-12	1.34514	0	1.34514	1579.51	26.3251		0.96801	1.44014	4.41342	4.41342	139.509	0.00149622	668.349	11.1391					pNP
1	0	2		21.5255	0	78.4745	1500	25	0.000666667		56.7135	2.63471		-0.0426081	2.5789	0	2.5789	2.5789	2291.6	38.1934		1.67135	2.63471	13.4553	13.4553	289.632	0.00165751	603.314	10.0552
1	0.1	0		90.2383	9.76172	0	355	5.91667	0.0028169		57.9543	0.642236		0.682257	8.3808e-12	0.682257	0	0.682257	556.938	9.2823		0.445501	0.642236	1.30909	0.445501	40.2012	0.0025003	399.952	6.66587
1	0	0.1		84.5821	0	15.4179	230	3.83333	0.00434783		160.102	1.89286		-0.0426081	1.89746	0	1.89746	1.89746	587.095	9.78492		1.42144	1.89286	2.33537	1.42144	120.228	0.0036813	271.643	4.52739
1	1	2		17.4598	18.8876	63.6526	327	5.45	0.0030581		786.262	45.0326		3.06115	4.14242	3.06115	4.14242	7.20357	2703.34	45.0557		8.14204	45.0326	45.0016	45.0016	785.721	0.00305624	327.2	5.45333
1	2	1		20.0547	43.3891	36.5562	322	5.36667	0.00310559		683.573	34.0855		4.306	15.435	4.306	15.435	19.741	2107.14	35.1189		19.7217	34.0855	37.0723	37.0723	743.472	0.00334299	299.133	4.98555
2	1	1		40.778	22.0563	37.1657	136	2.26667	0.00735294		812.4	19.9225		4.50472	15.4431	4.50472	15.4431	19.9478	1034.5	17.2417		19.7081	19.9225	21.8636	19.7081	803.66	0.00728251	137.315	2.28859
1	0.0198	0.029		93.0855	1.99381	4.92069	400	6.66667	0.0025		35.8966	0.38563		0.0443088	0.0828105	0.0443088	0.0828105	0.127119	542.896	9.04827		0.0153193	28.2388	0.856389	0.0153193	1.42601	0.00186587	535.944	8.93239
1	0.029	0.314		62.3543	1.95614	35.6896		0	#DIV/0!		#DIV/0!	#DIV/0!		0.0426518	15.3564	0.0426518	15.3564	15.399	703.205	11.7201		15.3527	10.4704	16.5879	15.3527	957.308	0.0130292	76.7508	1.27918
3	1	1		50.8078	18.3208	30.8713		0	#DIV/0!		#DIV/0!	#DIV/0!		2.83267	13.4694	2.83267	13.4694	16.3021	856.312	14.2719		16.6981		18.2732	16.6981	848.395	0.00952291	105.01	1.75017
1	2	3		11.5848	25.0641	63.3511		0	#DIV/0!		#DIV/0!	#DIV/0!		5.90294	4.21793	5.90294	4.21793	10.1209	3966.37	66.1062		10.6674		24.9792	24.9792	289.379	0.000891474	1121.74	18.6956
4	2	1		50.0853	27.0904	22.8242		0	#DIV/0!		#DIV/0!	#DIV/0!		6.62682	6.78629	6.62682	6.78629	13.4131	890.793	14.8465		13.1491		14.7537	13.1491	658.578	0.00750862	133.18	2.21967
1	4	1		13.9862	60.5194	25.4944		0	#DIV/0!		#DIV/0!	#DIV/0!		1.90998	9.1626	1.90998	9.1626	11.0726	3257.2	54.2867		11.0997		35.5587	35.5587	497.33	0.00165106	605.672	10.0945
1	1	4		10.6688	11.5413	77.7899		0	#DIV/0!		#DIV/0!	#DIV/0!		0.958158	2.57601	0.958158	2.57601	3.53417	4580.88	76.3481		2.53419		13.4909	13.4909	143.933	0.000514324	1944.3	32.405
2	3	1		28.296	45.9147	25.7893		0	#DIV/0!		#DIV/0!	#DIV/0!		3.78245	9.42737	3.78245	9.42737	13.2098	1579.58	26.3263		13.8232		18.2971	18.2971	517.733	0.00345442	289.484	4.82474
3	1	1		50.8078	18.3208	30.8713		0	#DIV/0!		#DIV/0!	#DIV/0!		2.83267	13.4694	2.83267	13.4694	16.3021	856.312	14.2719		16.6981		18.2732	16.6981	848.395	0.00952291	105.01	1.75017
1	4	5		6.92462	29.9634	63.1119		0	#DIV/0!		#DIV/0!	#DIV/0!		7.0917	4.27937	7.0917	4.27937	11.3711	6561.18	109.353		11.5943		14.3946	14.3946	99.6771	0.000273258	3659.54	60.9923
2	1	1		40.778	22.0563	37.1657		0	#DIV/0!		#DIV/0!	#DIV/0!		4.50472	15.4431	4.50472	15.4431	19.9478	1034.5	17.2417		19.7081		21.8636	19.7081	803.66	0.00728251	137.315	2.28859
3	2	1		42.9407	30.9681	26.0912		0	#DIV/0!		#DIV/0!	#DIV/0!		7.08774	9.69722	7.08774	9.69722	16.785	1009.01	16.8168		16.5093		18.4995	16.5093	708.923	0.00686477	145.671	2.42785
1	2	6		7.09194	15.3437	77.5643		0	#DIV/0!		#DIV/0!	#DIV/0!		1.82212	2.57619	1.82212	2.57619	4.39831	6834.27	113.904		3.75747		6.75013	6.75013	47.8715	0.000207252	4825.04	80.4173
1.44804	0.15748	0.046729		85	10	5		0	#DIV/0!		#DIV/0!	#DIV/0!		0.715357	0.0854	0.715357	0.0854	0.800757	590.565	9.84275		0.49154		1.40147	0.49154	41.7809	0.0023817	419.869	6.99782
0.851789	0.314961	0.280374		50	20	30		0	#DIV/0!		#DIV/0!	#DIV/0!		3.54019	12.8884	3.54019	12.8884	16.4286	869.202	14.4867		16.8723		18.4805	16.8723	843.616	0.00932427	107.247	1.78745
0.681431	0.629921	0.186916		40	40	20		0	#DIV/0!		#DIV/0!	#DIV/0!		5.12758	4.52422	5.12758	4.52422	9.6518	1153.65	19.2275		9.93823		12.1611	9.93823	397.529	0.00393304	254.256	4.23761
0.936968	0.0787402	0.373832		55	5	40		0	#DIV/0!		#DIV/0!	#DIV/0!		0.210728	15.0097	0.210728	15.0097	15.2204	798.469	13.3078		14.9646		16.3915	14.9646	823.056	0.0100332	99.669	1.66115
1.10733	0.23622	0.186916		65	15	20		0	#DIV/0!		#DIV/0!	#DIV/0!		1.72573	4.52422	1.72573	4.52422	6.24995	732.67	12.2112		6.14329		7.32425	6.14329	399.314	0.00641411	155.906	2.59844
0.76661	0.629921	0.140187		45	40	15		0	#DIV/0!		#DIV/0!	#DIV/0!		5.12758	1.7287	5.12758	1.7287	6.85628	1052.3	17.5383		6.99816		8.856	6.99816	314.917	0.00368998	271.004	4.51674
0.255537	1.25984	0.046729		15	80	5		0	#DIV/0!		#DIV/0!	#DIV/0!		0.71912	0.0854	0.71912	0.0854	0.80452	3346.41	55.7735		0.407334		30.5372	30.5372	458.058	0.00165432	604.477	10.0746
1.1925	0.314961	0.0934579		70	20	10		0	#DIV/0!		#DIV/0!	#DIV/0!		3.54019	0.46666	3.54019	0.46666	4.00685	695.009	11.5835		4.25195		5.34564	4.25195	297.637	0.0055009	181.788	3.0298
0.170358	1.10236	0.186916		10	70	20		0	#DIV/0!		#DIV/0!	#DIV/0!		1.24773	4.52422	1.24773	4.52422	5.77195	4783.88	79.7313		5.16911		13.9804	13.9804	139.804	0.000473921	2110.06	35.1676
1.60136	0.015748	0.046729		94	1	5		0	#DIV/0!		#DIV/0!	#DIV/0!		0.00307901	0.0854	0.00307901	0.0854	0.088479	537.822	8.9637		0.0115097		0.845699	0.0115097	1.08191	0.00187781	532.536	8.8756
1.46508	0.15748	0.0373832		86	10	4		0	#DIV/0!		#DIV/0!	#DIV/0!		0.715357	0.0570963	0.715357	0.0570963	0.772453	583.862	9.73103		0.487372		1.38791	0.487372	41.914	0.00241198	414.598	6.90996
0.596252	0.944882	0.046729		35	60	5		0	#DIV/0!		#DIV/0!	#DIV/0!		1.95417	0.0854	1.95417	0.0854	2.03957	1416.82	23.6136		1.7928		4.59844	4.59844	160.946	0.00180496	554.029	9.23382
1.02215	0.472441	0.0934579		60	30	10		0	#DIV/0!		#DIV/0!	#DIV/0!		7.09299	0.46666	7.09299	0.46666	7.55965	784.061	13.0677		7.16328		8.45241	7.16328	429.797	0.00628218	159.181	2.65301
0.511073	0.787402	0.186916		30	50	20		0	#DIV/0!		#DIV/0!	#DIV/0!		3.08861	4.52422	3.08861	4.52422	7.61283	1567.35	26.1225		7.68454		11.5597	11.5597	346.791	0.00264896	377.507	6.29179
1.53322	0.0787402	0.046729		90	5	5		0	#DIV/0!		#DIV/0!	#DIV/0!		0.210728	0.0854	0.210728	0.0854	0.296128	560.562	9.3427		0.061433		0.926984	0.061433	5.52897	0.001877	532.766	8.87943
1.1925	0.267717	0.121495		70	17	13		0	#DIV/0!		#DIV/0!	#DIV/0!		2.34469	1.0698	2.34469	1.0698	3.4145	698.99	11.6498		3.31479		4.40848	3.31479	232.036	0.00459338	217.705	3.62841
0.477002	0.188976	0.560748		28	12	60		0	#DIV/0!		#DIV/0!	#DIV/0!		1.04094	5.21067	1.04094	5.21067	6.25161	1700.81	28.3469		6.83072		11.4289	11.4289	320.01	0.00232417	430.261	7.17102
0.76661	0.23622	0.373832		45	15	40		0	#DIV/0!		#DIV/0!	#DIV/0!		1.72573	15.0097	1.72573	15.0097	16.7354	963.242	16.054		16.5466		18.4045	16.5466	744.598	0.00751125	133.134	2.21889
0.681431	0.787402	0.0934579		40	50	10		0	#DIV/0!		#DIV/0!	#DIV/0!		3.08861	0.46666	3.08861	0.46666	3.55527	1221.57	20.3595		3.63554		5.85844	3.63554	145.422	0.00194009	515.44	8.59066
0.76661	0.629921	0.140187		45	40	15		0	#DIV/0!		#DIV/0!	#DIV/0!		5.12758	1.7287	5.12758	1.7287	6.85628	1052.3	17.5383		6.99816		8.856	6.99816	314.917	0.00368998	271.004	4.51674
0.851789	0.472441	0.186916		50	30	20		0	#DIV/0!		#DIV/0!	#DIV/0!		7.09299	4.52422	7.09299	4.52422	11.6172	906.67	15.1112		11.0848		12.693	11.0848	554.238	0.0064648	154.684	2.57806
0.851789	0.393701	0.233645		50	25	25		0	#DIV/0!		#DIV/0!	#DIV/0!		5.87596	8.71757	5.87596	8.71757	14.5935	883.121	14.7187		14.6587		16.2669	14.6587	732.937	0.0082306	121.498	2.02496
0.936968	0.23622	0.280374		55	15	30		0	#DIV/0!		#DIV/0!	#DIV/0!		1.72573	12.8884	1.72573	12.8884	14.6142	802.693	13.3782		14.9079		16.3347	14.9079	819.933	0.00999927	100.007	1.66679
0.851789	0.15748	0.373832		50	10	40		0	#DIV/0!		#DIV/0!	#DIV/0!		0.715357	15.0097	0.715357	15.0097	15.7251	874.486	14.5748		15.3393		16.9475	15.3393	766.965	0.00856685	116.729	1.94548
1.44804	0.0787402	0.0934579		85	5	10		0	#DIV/0!		#DIV/0!	#DIV/0!		0.210728	0.46666	0.210728	0.46666	0.677388	591.289	9.85481		0.22287		1.13279	0.22287	18.9439	0.00199807	500.483	8.34138
1.36286	0.0787402	0.140187		80	5	15		0	#DIV/0!		#DIV/0!	#DIV/0!		0.210728	1.7287	0.210728	1.7287	1.93943	620.466	10.3411		1.301		2.26236	1.301	104.08	0.00322656	309.928	5.16546
1.27768	0.0787402	0.186916		75	5	20		0	#DIV/0!		#DIV/0!	#DIV/0!		0.210728	4.52422	0.210728	4.52422	4.73495	644.166	10.7361		4.39524		5.41697	4.39524	329.643	0.00636822	157.03	2.61716
1.1925	0.0787402	0.233645		70	5	25		0	#DIV/0!		#DIV/0!	#DIV/0!		0.210728	8.71757	0.210728	8.71757	8.9283	663.608	11.0601		9.09427		10.188	9.09427	636.599	0.0101901	98.1345	1.63557
1.10733	0.0787402	0.280374		65	5	30	150	2.5	0.00666667		418.974	6.44576		0.210728	12.8884	0.210728	12.8884	13.0992	688.3	11.4717		13.2997		14.4807	13.2997	864.482	0.0123896	80.7129	1.34521
1.02215	0.0787402	0.327103		60	5	35		0	#DIV/0!		#DIV/0!	#DIV/0!		0.210728	15.2364	0.210728	15.2364	15.4472	730.493	12.1749		15.3127		16.6018	15.3127	918.763	0.0120802	82.7802	1.37967
0.936968	0.0787402	0.373832		55	5	40		0	#DIV/0!		#DIV/0!	#DIV/0!		0.210728	15.0097	0.210728	15.0097	15.2204	798.469	13.3078		14.9646		16.3915	14.9646	823.056	0.0100332	99.669	1.66115
0.851789	0.0787402	0.420561		50	5	45		0	#DIV/0!		#DIV/0!	#DIV/0!		0.210728	12.8408	0.210728	12.8408	13.0515	895.167	14.9195		13.0731		14.6813	13.0731	653.656	0.00744719	134.279	2.23798
0.76661	0.0787402	0.46729		45	5	50		0	#DIV/0!		#DIV/0!	#DIV/0!		0.210728	9.94187	0.210728	9.94187	10.1526	1020.81	17.0134		10.5788		12.4367	10.5788	476.047	0.00512294	195.2	3.25334
0.681431	0.0787402	0.514019		40	5	55		0	#DIV/0!		#DIV/0!	#DIV/0!		0.210728	7.25981	0.210728	7.25981	7.47053	1177.07	19.6178		8.1256		10.3485	8.1256	325.024	0.00335987	297.63	4.9605
0.596252	0.0787402	0.560748		35	5	60		0	#DIV/0!		#DIV/0!	#DIV/0!		0.210728	5.21067	0.210728	5.21067	5.4214	1371.37	22.8561		6.02497		8.83061	8.83061	309.072	0.00282955	353.414	5.89023
0.511073	0.0787402	0.607477		30	5	65		0	#DIV/0!		#DIV/0!	#DIV/0!		0.210728	3.83084	0.210728	3.83084	4.04156	1621.15	27.0191		4.36339		8.23854	8.23854	247.156	0.00205824	485.853	8.09754
0.425894	0.0787402	0.654206		25	5	70		0	#DIV/0!		#DIV/0!	#DIV/0!		0.210728	3.00645	0.210728	3.00645	3.21718	1960.91	32.6819		3.11211		9.5353	9.5353	238.382	0.00167185	598.14	9.96899
0.340716	0.0787402	0.700935		20	5	75		0	#DIV/0!		#DIV/0!	#DIV/0!		0.210728	2.62483	0.210728	2.62483	2.83556	2460.24	41.004		2.19922		19.8345	19.8345	396.69	0.0019632	509.372	8.48954
0.255537	0.0787402	0.747664		15	5	80		0	#DIV/0!		#DIV/0!	#DIV/0!		0.210728	2.6	0.210728	2.6	2.81073	3281.11	54.6852		1.54698		31.6769	31.6769	475.153	0.001705	586.51	9.77517
0.170358	0.0787402	0.794393		10	5	85		0	#DIV/0!		#DIV/0!	#DIV/0!		0.210728	2.60511	0.210728	2.60511	2.81584	4921.42	82.0237		1.08743		9.89872	9.89872	98.9872	0.000393255	2542.88	42.3813
0.0851789	0.0787402	0.841121		5	5	90		0	#DIV/0!		#DIV/0!	#DIV/0!		0.210728	2	0.210728	2	2.21073	9901.11	165.019		0.766666		2.01852	2.01852	10.0926	0.000108787	9192.26	153.204
1.44804	0.15748	0.046729		85	10	5		0	#DIV/0!		#DIV/0!	#DIV/0!		0.715357	0.0854	0.715357	0.0854	0.800757	590.565	9.84275		0.49154		1.40147	0.49154	41.7809	0.0023817	419.869	6.99782
1.36286	0.15748	0.0934579		80	10	10		0	#DIV/0!		#DIV/0!	#DIV/0!		0.715357	0.46666	0.715357	0.46666	1.18202	625.111	10.4185		0.652377		1.61374	0.652377	52.1901	0.00240617	415.599	6.92664
1.27768	0.15748	0.140187		75	10	15		0	#DIV/0!		#DIV/0!	#DIV/0!		0.715357	1.7287	0.715357	1.7287	2.44406	658.571	10.9762		1.72649		2.74823	1.72649	129.487	0.00340149	293.989	4.89982
1.1925	0.15748	0.186916		70	10	20		0	#DIV/0!		#DIV/0!	#DIV/0!		0.715357	4.52422	0.715357	4.52422	5.23958	686.868	11.4478		4.80922		5.9029	4.80922	336.645	0.00604055	165.548	2.75913
1.10733	0.15748	0.233645		65	10	25		0	#DIV/0!		#DIV/0!	#DIV/0!		0.715357	8.71757	0.715357	8.71757	9.43293	711.36	11.856		9.49076		10.6717	9.49076	616.9	0.00920918	108.587	1.80979
1.02215	0.15748	0.280374		60	10	30		0	#DIV/0!		#DIV/0!	#DIV/0!		0.715357	12.8884	0.715357	12.8884	13.6038	742.346	12.3724		13.6806		14.9697	13.6806	820.834	0.010919	91.5836	1.52639
0.936968	0.15748	0.327103		55	10	35		0	#DIV/0!		#DIV/0!	#DIV/0!		0.715357	15.2364	0.715357	15.2364	15.9518	793.433	13.2239		15.6861		17.1129	15.6861	862.734	0.0104645	95.5612	1.59269
0.851789	0.15748	0.373832		50	10	40		0	#DIV/0!		#DIV/0!	#DIV/0!		0.715357	15.0097	0.715357	15.0097	15.7251	874.486	14.5748		15.3393		16.9475	15.3393	766.965	0.00856685	116.729	1.94548
0.76661	0.15748	0.420561		45	10	45		0	#DIV/0!		#DIV/0!	#DIV/0!		0.715357	12.8408	0.715357	12.8408	13.5561	990.21	16.5035		13.4548		15.3126	13.4548	605.466	0.00627391	159.39	2.6565
0.681431	0.15748	0.46729		40	10	50		0	#DIV/0!		#DIV/0!	#DIV/0!		0.715357	9.94187	0.715357	9.94187	10.6572	1143.17	19.0528		10.9698		13.1927	10.9698	438.791	0.00425922	234.785	3.91308
0.596252	0.15748	0.514019		35	10	55		0	#DIV/0!		#DIV/0!	#DIV/0!		0.715357	7.25981	0.715357	7.25981	7.97516	1338.93	22.3155		8.5257		11.3313	11.3313	396.597	0.00343496	291.124	4.85207
0.511073	0.15748	0.560748		30	10	60		0	#DIV/0!		#DIV/0!	#DIV/0!		0.715357	5.21067	0.715357	5.21067	5.92603	1592.31	26.5384		6.43289		10.308	10.308	309.241	0.00242633	412.145	6.86908
0.425894	0.15748	0.607477		25	10	65		0	#DIV/0!		#DIV/0!	#DIV/0!		0.715357	3.83084	0.715357	3.83084	4.54619	1935.99	32.2664		4.77749		11.2007	11.2007	280.017	0.00187755	532.608	8.8768
0.340716	0.15748	0.654206		20	10	70		0	#DIV/0!		#DIV/0!	#DIV/0!		0.715357	3.00645	0.715357	3.00645	3.72181	2439.22	40.6536		3.53087		21.1661	21.1661	423.323	0.00206847	483.449	8.05749
0.255537	0.15748	0.700935		15	10	75		0	#DIV/0!		#DIV/0!	#DIV/0!		0.715357	2.62483	0.715357	2.62483	3.34019	3264.3	54.405		2.62137		32.7513	32.7513	491.269	0.00175277	570.524	9.50874
0.170358	0.15748	0.747664		10	10	80		0	#DIV/0!		#DIV/0!	#DIV/0!		0.715357	2.6	0.715357	2.6	3.31536	4897.63	81.6271		1.97156		10.7829	10.7829	107.829	0.000410728	2434.7	40.5783
0.0851789	0.15748	0.794393		5	10	85		0	#DIV/0!		#DIV/0!	#DIV/0!		0.715357	2.60511	0.715357	2.60511	3.32047	9794.77	163.246		1.51372		2.76557	2.76557	13.8279	0.000112478	8890.62	148.177
1.27768	0.314961	0.046729		75	20	5		0	#DIV/0!		#DIV/0!	#DIV/0!		3.54019	0.0854	3.54019	0.0854	3.62559	651.062	10.851		4.09615		5.11789	4.09615	307.211	0.00603574	165.68	2.76133
1.1925	0.314961	0.0934579		70	20	10		0	#DIV/0!		#DIV/0!	#DIV/0!		3.54019	0.46666	3.54019	0.46666	4.00685	695.009	11.5835		4.25195		5.34564	4.25195	297.637	0.0055009	181.788	3.0298
1.10733	0.314961	0.140187		65	20	15		0	#DIV/0!		#DIV/0!	#DIV/0!		3.54019	1.7287	3.54019	1.7287	5.26889	739.498	12.325		5.29245		6.4734	5.29245	344.009	0.00570367	175.326	2.92209
1.02215	0.314961	0.186916		60	20	20		0	#DIV/0!		#DIV/0!	#DIV/0!		3.54019	4.52422	3.54019	4.52422	8.06441	780.399	13.0066		8.27867		9.5678	8.27867	496.72	0.00707574	141.328	2.35547
0.936968	0.314961	0.233645		55	20	25		0	#DIV/0!		#DIV/0!	#DIV/0!		3.54019	8.71757	3.54019	8.71757	12.2578	819.542	13.659		12.8137		14.2405	12.8137	704.752	0.0087473	114.321	1.90535
0.851789	0.314961	0.280374		50	20	30		0	#DIV/0!		#DIV/0!	#DIV/0!		3.54019	12.8884	3.54019	12.8884	16.4286	869.202	14.4867		16.8723		18.4805	16.8723	843.616	0.00932427	107.247	1.78745
0.76661	0.314961	0.327103		45	20	35		0	#DIV/0!		#DIV/0!	#DIV/0!		3.54019	15.2364	3.54019	15.2364	18.7766	946.688	15.7781		18.815		20.6729	18.815	846.677	0.00841906	118.778	1.97963
0.681431	0.314961	0.373832		40	20	40		0	#DIV/0!		#DIV/0!	#DIV/0!		3.54019	15.0097	3.54019	15.0097	18.5499	1067.06	17.7844		18.4791		20.702	18.4791	739.165	0.00663372	150.745	2.51242
0.596252	0.314961	0.420561		35	20	45		0	#DIV/0!		#DIV/0!	#DIV/0!		3.54019	12.8408	3.54019	12.8408	16.381	1242.23	20.7038		16.6536		19.4593	19.4593	681.074	0.00540269	185.093	3.08488
0.511073	0.314961	0.46729		30	20	50		0	#DIV/0!		#DIV/0!	#DIV/0!		3.54019	9.94187	3.54019	9.94187	13.4821	1486.28	24.7714		14.2464		18.1215	18.1215	543.646	0.00381609	262.049	4.36748
0.425894	0.314961	0.514019		25	20	55		0	#DIV/0!		#DIV/0!	#DIV/0!		3.54019	7.25981	3.54019	7.25981	10.8	1826.71	30.4452		11.8788		18.302	18.302	457.55	0.00275469	363.017	6.05028
0.340716	0.314961	0.560748		20	20	60		0	#DIV/0!		#DIV/0!	#DIV/0!		3.54019	5.21067	3.54019	5.21067	8.75086	2326.42	38.7736		9.85152		27.4868	27.4868	549.736	0.00256813	389.389	6.48982
0.255537	0.314961	0.607477		15	20	65		0	#DIV/0!		#DIV/0!	#DIV/0!		3.54019	3.83084	3.54019	3.83084	7.37102	3141.75	52.3626		8.24794		38.3778	38.3778	575.667	0.00200297	499.259	8.32099
0.170358	0.314961	0.654206		10	20	70		0	#DIV/0!		#DIV/0!	#DIV/0!		3.54019	3.00645	3.54019	3.00645	6.54664	4749.09	79.1516		7.04034		15.8516	15.8516	158.516	0.000510902	1957.32	32.622
0.0851789	0.314961	0.700935		5	20	75		0	#DIV/0!		#DIV/0!	#DIV/0!		3.54019	2.62483	3.54019	2.62483	6.16502	9532.33	158.872		6.15932		7.41117	7.41117	37.0559	0.000135431	7383.85	123.064
1.10733	0.472441	0.046729		65	30	5		0	#DIV/0!		#DIV/0!	#DIV/0!		7.09299	0.0854	7.09299	0.0854	7.17839	726.323	12.1054		7.01155		8.19251	7.01155	455.751	0.00713909	140.074	2.33456
1.02215	0.472441	0.0934579		60	30	10		0	#DIV/0!		#DIV/0!	#DIV/0!		7.09299	0.46666	7.09299	0.46666	7.55965	784.061	13.0677		7.16328		8.45241	7.16328	429.797	0.00628218	159.181	2.65301
0.936968	0.472441	0.140187		55	30	15		0	#DIV/0!		#DIV/0!	#DIV/0!		7.09299	1.7287	7.09299	1.7287	8.82169	845.42	14.0903		8.17658		9.60342	8.17658	449.712	0.00597513	167.36	2.78934
0.851789	0.472441	0.186916		50	30	20		0	#DIV/0!		#DIV/0!	#DIV/0!		7.09299	4.52422	7.09299	4.52422	11.6172	906.67	15.1112		11.0848		12.693	11.0848	554.238	0.0064648	154.684	2.57806
0.76661	0.472441	0.233645		45	30	25		0	#DIV/0!		#DIV/0!	#DIV/0!		7.09299	8.71757	7.09299	8.71757	15.8106	970.934	16.1822		15.5012		17.3591	15.5012	697.555	0.00709288	140.986	2.34977
0.681431	0.472441	0.280374		40	30	30		0	#DIV/0!		#DIV/0!	#DIV/0!		7.09299	12.8884	7.09299	12.8884	19.9814	1054.33	17.5722		19.4538		21.6767	19.4538	778.153	0.00694192	144.052	2.40087
0.596252	0.472441	0.327103		35	30	35		0	#DIV/0!		#DIV/0!	#DIV/0!		7.09299	15.2364	7.09299	15.2364	22.3294	1181.82	19.697		21.3458		24.1514	24.1514	845.299	0.00653863	152.937	2.54895
0.511073	0.472441	0.373832		30	30	40		0	#DIV/0!		#DIV/0!	#DIV/0!		7.09299	15.0097	7.09299	15.0097	22.1027	1381.35	23.0225		21.0186		24.8938	24.8938	746.813	0.00502063	199.178	3.31964
0.425894	0.472441	0.420561		25	30	45		0	#DIV/0!		#DIV/0!	#DIV/0!		7.09299	12.8408	7.09299	12.8408	19.9338	1687.6	28.1266		19.2408		25.664	25.664	641.6	0.00366403	272.923	4.54872
0.340716	0.472441	0.46729		20	30	50		0	#DIV/0!		#DIV/0!	#DIV/0!		7.09299	9.94187	7.09299	9.94187	17.0349	2161.75	36.0292		16.8965		34.5318	34.5318	690.636	0.00312504	319.996	5.33326
0.255537	0.472441	0.514019		15	30	55		0	#DIV/0!		#DIV/0!	#DIV/0!		7.09299	7.25981	7.09299	7.25981	14.3528	2949.94	49.1656		14.5908		44.7207	44.7207	670.811	0.00228501	437.635	7.29391
0.170358	0.472441	0.560748		10	30	60		0	#DIV/0!		#DIV/0!	#DIV/0!		7.09299	5.21067	7.09299	5.21067	12.3037	4505.64	75.094		12.6165		21.4278	21.4278	214.278	0.000621103	1610.04	26.834
0.0851789	0.472441	0.607477		5	30	65		0	#DIV/0!		#DIV/0!	#DIV/0!		7.09299	3.83084	7.09299	3.83084	10.9238	9123.38	152.056		11.0548		12.3067	12.3067	61.5334	0.000159618	6264.96	104.416
0.936968	0.629921	0.046729		55	40	5		0	#DIV/0!		#DIV/0!	#DIV/0!		5.12758	0.0854	5.12758	0.0854	5.21298	874.417	14.5736		5.82036		7.2472	5.82036	320.12	0.00456652	218.985	3.64975
1.02215	0.472441	0.0934579		60	30	10		0	#DIV/0!		#DIV/0!	#DIV/0!		7.09299	0.46666	7.09299	0.46666	7.55965	784.061	13.0677		7.16328		8.45241	7.16328	429.797	0.00628218	159.181	2.65301
0.936968	0.472441	0.140187		55	30	15		0	#DIV/0!		#DIV/0!	#DIV/0!		7.09299	1.7287	7.09299	1.7287	8.82169	845.42	14.0903		8.17658		9.60342	8.17658	449.712	0.00597513	167.36	2.78934
0.851789	0.472441	0.186916		50	30	20		0	#DIV/0!		#DIV/0!	#DIV/0!		7.09299	4.52422	7.09299	4.52422	11.6172	906.67	15.1112		11.0848		12.693	11.0848	554.238	0.0064648	154.684	2.57806
0.76661	0.472441	0.233645		45	30	25		0	#DIV/0!		#DIV/0!	#DIV/0!		7.09299	8.71757	7.09299	8.71757	15.8106	970.934	16.1822		15.5012		17.3591	15.5012	697.555	0.00709288	140.986	2.34977
0.681431	0.472441	0.280374		40	30	30		0	#DIV/0!		#DIV/0!	#DIV/0!		7.09299	12.8884	7.09299	12.8884	19.9814	1054.33	17.5722		19.4538		21.6767	19.4538	778.153	0.00694192	144.052	2.40087
0.596252	0.472441	0.327103		35	30	35		0	#DIV/0!		#DIV/0!	#DIV/0!		7.09299	15.2364	7.09299	15.2364	22.3294	1181.82	19.697		21.3458		24.1514	24.1514	845.299	0.00653863	152.937	2.54895
0.511073	0.472441	0.373832		30	30	40		0	#DIV/0!		#DIV/0!	#DIV/0!		7.09299	15.0097	7.09299	15.0097	22.1027	1381.35	23.0225		21.0186		24.8938	24.8938	746.813	0.00502063	199.178	3.31964
0.425894	0.472441	0.420561		25	30	45		0	#DIV/0!		#DIV/0!	#DIV/0!		7.09299	12.8408	7.09299	12.8408	19.9338	1687.6	28.1266		19.2408		25.664	25.664	641.6	0.00366403	272.923	4.54872
0.340716	0.472441	0.46729		20	30	50		0	#DIV/0!		#DIV/0!	#DIV/0!		7.09299	9.94187	7.09299	9.94187	17.0349	2161.75	36.0292		16.8965		34.5318	34.5318	690.636	0.00312504	319.996	5.33326
0.255537	0.472441	0.514019		15	30	55		0	#DIV/0!		#DIV/0!	#DIV/0!		7.09299	7.25981	7.09299	7.25981	14.3528	2949.94	49.1656		14.5908		44.7207	44.7207	670.811	0.00228501	437.635	7.29391
0.170358	0.472441	0.560748		10	30	60		0	#DIV/0!		#DIV/0!	#DIV/0!		7.09299	5.21067	7.09299	5.21067	12.3037	4505.64	75.094		12.6165		21.4278	21.4278	214.278	0.000621103	1610.04	26.834
0.0851789	0.472441	0.607477		5	30	65		0	#DIV/0!		#DIV/0!	#DIV/0!		7.09299	3.83084	7.09299	3.83084	10.9238	9123.38	152.056		11.0548		12.3067	12.3067	61.5334	0.000159618	6264.96	104.416
0.936968	0.629921	0.046729		55	40	5		0	#DIV/0!		#DIV/0!	#DIV/0!		5.12758	0.0854	5.12758	0.0854	5.21298	874.417	14.5736		5.82036		7.2472	5.82036	320.12	0.00456652	218.985	3.64975
1.02215	0.472441	0.0934579		60	30	10		0	#DIV/0!		#DIV/0!	#DIV/0!		7.09299	0.46666	7.09299	0.46666	7.55965	784.061	13.0677		7.16328		8.45241	7.16328	429.797	0.00628218	159.181	2.65301
0.936968	0.472441	0.140187		55	30	15		0	#DIV/0!		#DIV/0!	#DIV/0!		7.09299	1.7287	7.09299	1.7287	8.82169	845.42	14.0903		8.17658		9.60342	8.17658	449.712	0.00597513	167.36	2.78934
0.851789	0.472441	0.186916		50	30	20		0	#DIV/0!		#DIV/0!	#DIV/0!		7.09299	4.52422	7.09299	4.52422	11.6172	906.67	15.1112		11.0848		12.693	11.0848	554.238	0.0064648	154.684	2.57806
0.76661	0.472441	0.233645		45	30	25		0	#DIV/0!		#DIV/0!	#DIV/0!		7.09299	8.71757	7.09299	8.71757	15.8106	970.934	16.1822		15.5012		17.3591	15.5012	697.555	0.00709288	140.986	2.34977
0.681431	0.472441	0.280374		40	30	30		0	#DIV/0!		#DIV/0!	#DIV/0!		7.09299	12.8884	7.09299	12.8884	19.9814	1054.33	17.5722		19.4538		21.6767	19.4538	778.153	0.00694192	144.052	2.40087
0.596252	0.472441	0.327103		35	30	35		0	#DIV/0!		#DIV/0!	#DIV/0!		7.09299	15.2364	7.09299	15.2364	22.3294	1181.82	19.697		21.3458		24.1514	24.1514	845.299	0.00653863	152.937	2.54895
0.511073	0.472441	0.373832		30	30	40		0	#DIV/0!		#DIV/0!	#DIV/0!		7.09299	15.0097	7.09299	15.0097	22.1027	1381.35	23.0225		21.0186		24.8938	24.8938	746.813	0.00502063	199.178	3.31964
0.425894	0.472441	0.420561		25	30	45		0	#DIV/0!		#DIV/0!	#DIV/0!		7.09299	12.8408	7.09299	12.8408	19.9338	1687.6	28.1266		19.2408		25.664	25.664	641.6	0.00366403	272.923	4.54872
0.340716	0.472441	0.46729		20	30	50		0	#DIV/0!		#DIV/0!	#DIV/0!		7.09299	9.94187	7.09299	9.94187	17.0349	2161.75	36.0292		16.8965		34.5318	34.5318	690.636	0.00312504	319.996	5.33326
0.255537	0.472441	0.514019		15	30	55		0	#DIV/0!		#DIV/0!	#DIV/0!		7.09299	7.25981	7.09299	7.25981	14.3528	2949.94	49.1656		14.5908		44.7207	44.7207	670.811	0.00228501	437.635	7.29391
0.170358	0.472441	0.560748		10	30	60		0	#DIV/0!		#DIV/0!	#DIV/0!		7.09299	5.21067	7.09299	5.21067	12.3037	4505.64	75.094		12.6165		21.4278	21.4278	214.278	0.000621103	1610.04	26.834
0.0851789	0.472441	0.607477		5	30	65		0	#DIV/0!		#DIV/0!	#DIV/0!		7.09299	3.83084	7.09299	3.83084	10.9238	9123.38	152.056		11.0548		12.3067	12.3067	61.5334	0.000159618	6264.96	104.416
0.936968	0.629921	0.046729		55	40	5		0	#DIV/0!		#DIV/0!	#DIV/0!		5.12758	0.0854	5.12758	0.0854	5.21298	874.417	14.5736		5.82036		7.2472	5.82036	320.12	0.00456652	218.985	3.64975
0.851789	0.629921	0.0934579		50	40	10		0	#DIV/0!		#DIV/0!	#DIV/0!		5.12758	0.46666	5.12758	0.46666	5.59424	958.386	15.9731		5.97375		7.58195	5.97375	298.688	0.0039396	253.833	4.23055
0.76661	0.629921	0.140187		45	40	15		0	#DIV/0!		#DIV/0!	#DIV/0!		5.12758	1.7287	5.12758	1.7287	6.85628	1052.3	17.5383		6.99816		8.856	6.99816	314.917	0.00368998	271.004	4.51674
0.681431	0.629921	0.186916		40	40	20		0	#DIV/0!		#DIV/0!	#DIV/0!		5.12758	4.52422	5.12758	4.52422	9.6518	1153.65	19.2275		9.93823		12.1611	9.93823	397.529	0.00393304	254.256	4.23761
0.596252	0.629921	0.233645		35	40	25		0	#DIV/0!		#DIV/0!	#DIV/0!		5.12758	8.71757	5.12758	8.71757	13.8451	1269.9	21.1649		14.4031		17.2088	17.2088	602.307	0.00485785	205.852	3.43087
0.511073	0.629921	0.280374		30	40	30		0	#DIV/0!		#DIV/0!	#DIV/0!		5.12758	12.8884	5.12758	12.8884	18.016	1429.18	23.8197		18.3991		22.2742	22.2742	668.226	0.0045547	219.553	3.65922
0.425894	0.629921	0.327103		25	40	35		0	#DIV/0!		#DIV/0!	#DIV/0!		5.12758	15.2364	5.12758	15.2364	20.364	1681.57	28.0261		20.3117		26.7349	26.7349	668.373	0.00379631	263.414	4.39023
0.340716	0.629921	0.373832		20	40	40		0	#DIV/0!		#DIV/0!	#DIV/0!		5.12758	15.0097	5.12758	15.0097	20.1373	2105.92	35.0987		19.981		37.6163	37.6163	752.326	0.00336888	296.835	4.94725
0.255537	0.629921	0.420561		15	40	45		0	#DIV/0!		#DIV/0!	#DIV/0!		5.12758	12.8408	5.12758	12.8408	17.9683	2859.52	47.6587		18.1837		48.3136	48.3136	724.704	0.00244478	409.035	6.81726
0.170358	0.629921	0.46729		10	40	50		0	#DIV/0!		#DIV/0!	#DIV/0!		5.12758	9.94187	5.12758	9.94187	15.0694	4397.34	73.2891		15.8137		24.625	24.625	246.25	0.000684289	1461.37	24.3562
0.0851789	0.629921	0.514019		5	40	55		0	#DIV/0!		#DIV/0!	#DIV/0!		5.12758	7.25981	5.12758	7.25981	12.3874	9004.57	150.076		13.4827		14.7346	14.7346	73.6729	0.000171614	5827.05	97.1174
0.76661	0.787402	0.046729		45	50	5		0	#DIV/0!		#DIV/0!	#DIV/0!		3.08861	0.0854	3.08861	0.0854	3.17401	1089.85	18.1642		3.47888		5.33671	3.47888	156.549	0.00228157	438.295	7.30492
0.681431	0.787402	0.0934579		40	50	10		0	#DIV/0!		#DIV/0!	#DIV/0!		3.08861	0.46666	3.08861	0.46666	3.55527	1221.57	20.3595		3.63554		5.85844	3.63554	145.422	0.00194009	515.44	8.59066
0.596252	0.787402	0.140187		35	50	15		0	#DIV/0!		#DIV/0!	#DIV/0!		3.08861	1.7287	3.08861	1.7287	4.81731	1379.27	22.9878		4.68179		7.48743	7.48743	262.06	0.00250437	399.302	6.65504
0.511073	0.787402	0.186916		30	50	20		0	#DIV/0!		#DIV/0!	#DIV/0!		3.08861	4.52422	3.08861	4.52422	7.61283	1567.35	26.1225		7.68454		11.5597	11.5597	346.791	0.00264896	377.507	6.29179
0.425894	0.787402	0.233645		25	50	25		0	#DIV/0!		#DIV/0!	#DIV/0!		3.08861	8.71757	3.08861	8.71757	11.8062	1810.28	30.1713		12.2446		18.6678	18.6678	466.696	0.00279988	357.158	5.95264
0.340716	0.787402	0.280374		20	50	30		0	#DIV/0!		#DIV/0!	#DIV/0!		3.08861	12.8884	3.08861	12.8884	15.977	2181.47	36.3578		16.3258		33.961	33.961	679.221	0.00307992	324.683	5.41139
0.255537	0.787402	0.327103		15	50	35		0	#DIV/0!		#DIV/0!	#DIV/0!		3.08861	15.2364	3.08861	15.2364	18.325	2850.9	47.5151		18.2792		48.4091	48.4091	726.137	0.00244902	408.326	6.80544
0.170358	0.787402	0.373832		10	50	40		0	#DIV/0!		#DIV/0!	#DIV/0!		3.08861	15.0097	3.08861	15.0097	18.0983	4284.57	71.4094		17.9414		26.7527	26.7527	267.527	0.000726339	1376.77	22.9461
0.0851789	0.787402	0.420561		5	50	45		0	#DIV/0!		#DIV/0!	#DIV/0!		3.08861	12.8408	3.08861	12.8408	15.9294	8729.45	145.491		16.1058		17.3577	17.3577	86.7885	0.000184574	5417.89	90.2982
0.596252	0.944882	0.046729		35	60	5		0	#DIV/0!		#DIV/0!	#DIV/0!		1.95417	0.0854	1.95417	0.0854	2.03957	1416.82	23.6136		1.7928		4.59844	4.59844	160.946	0.00180496	554.029	9.23382
0.511073	0.944882	0.0934579		30	60	10		0	#DIV/0!		#DIV/0!	#DIV/0!		1.95417	0.46666	1.95417	0.46666	2.42083	1646.8	27.4467		1.95182		5.82697	5.82697	174.809	0.0016293	613.759	10.2293
0.425894	0.944882	0.140187		25	60	15		0	#DIV/0!		#DIV/0!	#DIV/0!		1.95417	1.7287	1.95417	1.7287	3.68287	1952.11	32.5351		3.0138		9.43699	9.43699	235.925	0.00165971	602.516	10.0419
0.340716	0.944882	0.186916		20	60	20		0	#DIV/0!		#DIV/0!	#DIV/0!		1.95417	4.52422	1.95417	4.52422	6.47839	2376.07	39.6011		6.06169		23.697	23.697	473.939	0.00226853	440.813	7.34689
0.255537	0.944882	0.233645		15	60	25		0	#DIV/0!		#DIV/0!	#DIV/0!		1.95417	8.71757	1.95417	8.71757	10.6717	3048.05	50.8009		10.6903		40.8202	40.8202	612.303	0.00211157	473.581	7.89302
0.170358	0.944882	0.280374		10	60	30		0	#DIV/0!		#DIV/0!	#DIV/0!		1.95417	12.8884	1.95417	12.8884	14.8426	4406.03	73.4338		14.8328		23.6441	23.6441	236.441	0.000664903	1503.98	25.0663
0.0851789	0.944882	0.327103		5	60	35		0	#DIV/0!		#DIV/0!	#DIV/0!		1.95417	15.2364	1.95417	15.2364	17.1906	8635.5	143.925		16.8156		18.0675	18.0675	90.3374	0.00018808	5316.87	88.6146
0.425894	1.10236	0.046729		25	70	5		0	#DIV/0!		#DIV/0!	#DIV/0!		1.24773	0.0854	1.24773	0.0854	1.33313	1997.37	33.2895		0.865457		7.28865	7.28865	182.216	0.00139435	717.181	11.953
0.340716	1.10236	0.0934579		20	70	10		0	#DIV/0!		#DIV/0!	#DIV/0!		1.24773	0.46666	1.24773	0.46666	1.71439	2487.36	41.4559		1.02577		18.661	18.661	373.221	0.00187044	534.634	8.91057
0.255537	1.10236	0.140187		15	70	15		0	#DIV/0!		#DIV/0!	#DIV/0!		1.24773	1.7287	1.24773	1.7287	2.97643	3275.83	54.5972		2.0964		32.2263	32.2263	483.394	0.00172943	578.225	9.63709
0.170358	1.10236	0.186916		10	70	20		0	#DIV/0!		#DIV/0!	#DIV/0!		1.24773	4.52422	1.24773	4.52422	5.77195	4783.88	79.7313		5.16911		13.9804	13.9804	139.804	0.000473921	2110.06	35.1676
0.0851789	1.10236	0.233645		5	70	25		0	#DIV/0!		#DIV/0!	#DIV/0!		1.24773	8.71757	1.24773	8.71757	9.9653	9202.9	153.382		9.83546		11.0873	11.0873	55.4366	0.000153593	6510.69	108.512
0.255537	1.25984	0.046729		15	80	5		0	#DIV/0!		#DIV/0!	#DIV/0!		0.71912	0.0854	0.71912	0.0854	0.80452	3346.41	55.7735		0.407334		30.5372	30.5372	458.058	0.00165432	604.477	10.0746
0.170358	1.25984	0.0934579		10	80	10		0	#DIV/0!		#DIV/0!	#DIV/0!		0.71912	0.46666	0.71912	0.46666	1.18578	5000.7	83.345		0.568288		9.37959	9.37959	93.7959	0.000382996	2610.99	43.5166
0.0851789	1.25984	0.140187		5	80	15		0	#DIV/0!		#DIV/0!	#DIV/0!		0.71912	1.7287	0.71912	1.7287	2.44782	9878.2	164.637		1.64319		2.89505	2.89505	14.4752	0.000113118	8840.34	147.339
1	1	1		25.6108	27.7051	46.6841		0	#DIV/0!		#DIV/0!	#DIV/0!		6.78646	11.8881	6.78646	11.8881	18.6745	1664.83	27.7471		18.2424		24.1834	24.1834	619.357	0.00364097	274.652	4.57753
		1

## Sheet: Sheet2
Synrgesim Cu								Syn Ag
% Cu	Syn/Ni							%Ag	Syn/Ni
35.1	6.46							47.7	11.2934
52	2.76							64.6	3.919
9.76	0.64							15.4	1.89
68.4	1.4							78.5	2.6
								0	0
								100	0

## Sheet: Sheet3
Three dimensional simulation							Linear simulated
Ni	Cu	Ag		%Ni	%Cu	%Ag
1	1	2		17.4598	18.8876	63.6526	7.25288
1	2	1		20.0547	43.3891	36.5562	19.7409
2	1	1		40.778	22.0563	37.1657	19.9707
1	1	1		25.6108	27.7051	46.6841	18.6296
1	0.73	0.314		42.3359	33.4324	24.2317	14.8365
3	1	1		50.8078	18.3208	30.8713	16.3512
1	2	3		11.5848	25.0641	63.3511	10.0946
4	2	1		50.0853	27.0904	22.8242	13.3687
1	4	1		13.9862	60.5194	25.4944	11.0509
1	1	4		10.6688	11.5413	77.7899	3.5242
2	3	1		28.296	45.9147	25.7893	13.1887
3	1	1		50.8078	18.3208	30.8713	16.3512
1	4	5		6.92462	29.9634	63.1119	11.3443
2	1	1		40.778	22.0563	37.1657	19.9707
3	2	1		42.9407	30.9681	26.0912	16.773
1	2	6		7.09194	15.3437	77.5643	4.43567
1.44804	0.15748	0.046729		85	10	5	0.761025
0.851789	0.314961	0.280374		50	20	30	16.474
0.681431	0.629921	0.186916		40	40	20	9.68164
0.936968	0.0787402	0.373832		55	5	40	15.1635
1.10733	0.23622	0.186916		65	15	20	6.27335
0.76661	0.629921	0.140187		45	40	15	6.88612
0.255537	1.25984	0.046729		15	80	5	1.05265
1.1925	0.314961	0.0934579		70	20	10	4.05222
0.170358	1.10236	0.186916		10	70	20	5.84906
1.60136	0.015748	0.046729		94	1	5	0.0913654
1.46508	0.15748	0.0373832		86	10	4	0.73345
0.596252	0.944882	0.046729		35	60	5	2.01447
1.02215	0.472441	0.0934579		60	30	10	7.53343
0.511073	0.787402	0.186916		30	50	20	7.56949
1.53322	0.0787402	0.046729		90	5	5	0.239239
1.1925	0.267717	0.121495		70	17	13	3.45772
0.477002	0.188976	0.560748		28	12	60	6.2355
0.76661	0.23622	0.373832		45	15	40	16.7588
0.681431	0.787402	0.0934579		40	50	10	3.51193
0.76661	0.629921	0.140187		45	40	15	6.88612
0.851789	0.472441	0.186916		50	30	20	11.591
0.851789	0.393701	0.233645		50	25	25	14.5682
0.936968	0.23622	0.280374		55	15	30	14.6375
0.851789	0.15748	0.373832		50	10	40	15.6853

## Sheet: Sheet4
	real syn	mole ratio				Wt% ratio			simul/(Ag/Cu)	real/(Ag/Cu)	Mole ratios			wt ratios
simulated function 3 dimensional		Ni	Cu	Ag		Ni%	%Cu	%Ag			Cu/Ni	Ag/Ni	Ag/Cu	Cu/Ni	Ag/Ni	Ag/Cu
0.00177524	0	1	0	0		100	0	0	#DIV/0!	#DIV/0!	#DIV/0!	0	#DIV/0!	0	0	#DIV/0!
18.2424	28.2388	1	1	1		25.6108	27.7051	46.6841	10.8261	16.7586	1	1	1	1.08177	1.82283	1.68504
6.75292	6.46852	2	1	0		64.8977	35.1023	0	#DIV/0!	#DIV/0!	2	0	0	0.540886	0	0
11.7134	11.2934	2	0	1		52.3173	0	47.6827	#DIV/0!	#DIV/0!	#DIV/0!	0.5	#DIV/0!	0	0.911414	#DIV/0!
3.07186	2.76975	1	1	0		48.036	51.964	0	#DIV/0!	#DIV/0!	1	0	0	1.08177	0	0
4.43788	3.91963	1	0	1		35.4255	0	64.5745	#DIV/0!	#DIV/0!	#DIV/0!	1	#DIV/0!	0	1.82283	#DIV/0!
0.96801	1.44014	1	2	0		31.6101	68.3899	0	#DIV/0!	#DIV/0!	0.5	0	0	2.16354	0	0
1.67135	2.63471	1	0	2		21.5255	0	78.4745	#DIV/0!	#DIV/0!	#DIV/0!	2	#DIV/0!	0	3.64566	#DIV/0!
0.445501	0.642236	1	0.1	0		90.2383	9.76172	0	#DIV/0!	#DIV/0!	10	0	0	0.108177	0	0
1.42144	1.89286	1	0	0.1		84.5821	0	15.4179	#DIV/0!	#DIV/0!	#DIV/0!	0.1	#DIV/0!	0	0.182283	#DIV/0!
8.14204	45.0326	1	1	2		17.4598	18.8876	63.6526	2.41598	13.3625	1	2	2	1.08177	3.64566	3.37008
19.7217	34.0855	1	2	1		20.0547	43.3891	36.5562	23.408	40.4566	0.5	1	0.5	2.16354	1.82283	0.84252
19.7081	19.9225	2	1	1		40.778	22.0563	37.1657	11.696	11.8232	2	0.5	1	0.540886	0.911414	1.68504
18.2424	28.2388	1	1	1		25.6108	27.7051	46.6841	10.8261	16.7586	1	1	1	1.08177	1.82283	1.68504
14.7404	10.4704	1	0.73	0.314		42.3359	33.4324	24.2317	20.3373	14.446	1.36986	0.314	0.430137	0.789693	0.572368	0.724798

## Sheet: Sheet5
%Ni	simulated	real	diffrence									sim	real
100	0.00177524	0	-0.00177524									100	0
			0									80	0
			0									70	0
			0									60	0
			0									50	0
			0									40.778	0.214333
			0									25.6108	9.99646
			0									20.0547	14.3638
			0									19	26
			0									18.5	29
17.4598	8.14204	45.0326	36.8906									18	32
20.0547	19.7217	34.0855	14.3638									17.4598	36.8906
40.778	19.7081	19.9225	0.214333									15	30
25.6108	18.2424	28.2388	9.99646									14	25
0	0	0	0									12	15
												10	10
												5	1
												4	0
												3	0
												2	0
												1	0
												0	0

## Sheet: Sheet6
Ni	Cu	Ag		Ni%	%Cu	%Ag	real
1	1	2		17.4598	18.8876	63.6526	45.0016
1	2	1		20.0547	43.3891	36.5562	37.0723
2	1	1		40.778	22.0563	37.1657	19.7081
1	1	1		25.6108	27.7051	46.6841	24.1834
1	0.73	0.314		42.3359	33.4324	24.2317	14.7404
3	1	1		50.8078	18.3208	30.8713	16.6981
1	2	3		11.5848	25.0641	63.3511	24.9792
4	2	1		50.0853	27.0904	22.8242	13.1491
1	4	1		13.9862	60.5194	25.4944	35.5587
1	1	4		10.6688	11.5413	77.7899	13.4909
2	3	1		28.296	45.9147	25.7893	18.2971
3	1	1		50.8078	18.3208	30.8713	16.6981
1	4	5		6.92462	29.9634	63.1119	14.3946
2	1	1		40.778	22.0563	37.1657	19.7081
3	2	1		42.9407	30.9681	26.0912	16.5093
1	2	6		7.09194	15.3437	77.5643	6.75013
1.44804	0.15748	0.046729		85	10	5	0.49154
0.851789	0.314961	0.280374		50	20	30	16.8723
0.681431	0.629921	0.186916		40	40	20	9.93823
0.936968	0.0787402	0.373832		55	5	40	14.9646
1.10733	0.23622	0.186916		65	15	20	6.14329
0.76661	0.629921	0.140187		45	40	15	6.99816
0.255537	1.25984	0.046729		15	80	5	30.5372
1.1925	0.314961	0.0934579		70	20	10	4.25195
0.170358	1.10236	0.186916		10	70	20	13.9804
1.60136	0.015748	0.046729		94	1	5	0.0115097
1.46508	0.15748	0.0373832		86	10	4	0.487372
0.596252	0.944882	0.046729		35	60	5	4.59844
1.02215	0.472441	0.0934579		60	30	10	7.16328
0.511073	0.787402	0.186916		30	50	20	11.5597
1.53322	0.0787402	0.046729		90	5	5	0.061433
1.1925	0.267717	0.121495		70	17	13	3.31479
0.477002	0.188976	0.560748		28	12	60	11.4289
0.76661	0.23622	0.373832		45	15	40	16.5466
0.681431	0.787402	0.0934579		40	50	10	3.63554
0.76661	0.629921	0.140187		45	40	15	6.99816
0.851789	0.472441	0.186916		50	30	20	11.0848
0.851789	0.393701	0.233645		50	25	25	14.6587
0.936968	0.23622	0.280374		55	15	30	14.9079
0.851789	0.15748	0.373832		50	10	40	15.3393
1.44804	0.0787402	0.0934579		85	5	10	0.22287
1.36286	0.0787402	0.140187		80	5	15	1.301
1.27768	0.0787402	0.186916		75	5	20	4.39524
1.1925	0.0787402	0.233645		70	5	25	9.09427
1.10733	0.0787402	0.280374		65	5	30	13.2997
1.02215	0.0787402	0.327103		60	5	35	15.3127
0.936968	0.0787402	0.373832		55	5	40	14.9646
0.851789	0.0787402	0.420561		50	5	45	13.0731
0.76661	0.0787402	0.46729		45	5	50	10.5788
0.681431	0.0787402	0.514019		40	5	55	8.1256
0.596252	0.0787402	0.560748		35	5	60	8.83061
0.511073	0.0787402	0.607477		30	5	65	8.23854
0.425894	0.0787402	0.654206		25	5	70	9.5353
0.340716	0.0787402	0.700935		20	5	75	19.8345
0.255537	0.0787402	0.747664		15	5	80	31.6769
0.170358	0.0787402	0.794393		10	5	85	9.89872
0.0851789	0.0787402	0.841121		5	5	90	2.01852
1.44804	0.15748	0.046729		85	10	5	0.49154
1.36286	0.15748	0.0934579		80	10	10	0.652377
1.27768	0.15748	0.140187		75	10	15	1.72649
1.1925	0.15748	0.186916		70	10	20	4.80922
1.10733	0.15748	0.233645		65	10	25	9.49076
1.02215	0.15748	0.280374		60	10	30	13.6806
0.936968	0.15748	0.327103		55	10	35	15.6861
0.851789	0.15748	0.373832		50	10	40	15.3393
0.76661	0.15748	0.420561		45	10	45	13.4548
0.681431	0.15748	0.46729		40	10	50	10.9698
0.596252	0.15748	0.514019		35	10	55	11.3313
0.511073	0.15748	0.560748		30	10	60	10.308
0.425894	0.15748	0.607477		25	10	65	11.2007
0.340716	0.15748	0.654206		20	10	70	21.1661
0.255537	0.15748	0.700935		15	10	75	32.7513
0.170358	0.15748	0.747664		10	10	80	10.7829
0.0851789	0.15748	0.794393		5	10	85	2.76557
1.27768	0.314961	0.046729		75	20	5	4.09615
1.1925	0.314961	0.0934579		70	20	10	4.25195
1.10733	0.314961	0.140187		65	20	15	5.29245
1.02215	0.314961	0.186916		60	20	20	8.27867
0.936968	0.314961	0.233645		55	20	25	12.8137
0.851789	0.314961	0.280374		50	20	30	16.8723
0.76661	0.314961	0.327103		45	20	35	18.815
0.681431	0.314961	0.373832		40	20	40	18.4791
0.596252	0.314961	0.420561		35	20	45	19.4593
0.511073	0.314961	0.46729		30	20	50	18.1215
0.425894	0.314961	0.514019		25	20	55	18.302
0.340716	0.314961	0.560748		20	20	60	27.4868
0.255537	0.314961	0.607477		15	20	65	38.3778
0.170358	0.314961	0.654206		10	20	70	15.8516
0.0851789	0.314961	0.700935		5	20	75	7.41117
1.10733	0.472441	0.046729		65	30	5	7.01155
1.02215	0.472441	0.0934579		60	30	10	7.16328
0.936968	0.472441	0.140187		55	30	15	8.17658
0.851789	0.472441	0.186916		50	30	20	11.0848
0.76661	0.472441	0.233645		45	30	25	15.5012
0.681431	0.472441	0.280374		40	30	30	19.4538
0.596252	0.472441	0.327103		35	30	35	24.1514
0.511073	0.472441	0.373832		30	30	40	24.8938
0.425894	0.472441	0.420561		25	30	45	25.664
0.340716	0.472441	0.46729		20	30	50	34.5318
0.255537	0.472441	0.514019		15	30	55	44.7207
0.170358	0.472441	0.560748		10	30	60	21.4278
0.0851789	0.472441	0.607477		5	30	65	12.3067
0.936968	0.629921	0.046729		55	40	5	5.82036
1.02215	0.472441	0.0934579		60	30	10	7.16328
0.936968	0.472441	0.140187		55	30	15	8.17658
0.851789	0.472441	0.186916		50	30	20	11.0848
0.76661	0.472441	0.233645		45	30	25	15.5012
0.681431	0.472441	0.280374		40	30	30	19.4538
0.596252	0.472441	0.327103		35	30	35	24.1514
0.511073	0.472441	0.373832		30	30	40	24.8938
0.425894	0.472441	0.420561		25	30	45	25.664
0.340716	0.472441	0.46729		20	30	50	34.5318
0.255537	0.472441	0.514019		15	30	55	44.7207
0.170358	0.472441	0.560748		10	30	60	21.4278
0.0851789	0.472441	0.607477		5	30	65	12.3067
0.936968	0.629921	0.046729		55	40	5	5.82036
1.02215	0.472441	0.0934579		60	30	10	7.16328
0.936968	0.472441	0.140187		55	30	15	8.17658
0.851789	0.472441	0.186916		50	30	20	11.0848
0.76661	0.472441	0.233645		45	30	25	15.5012
0.681431	0.472441	0.280374		40	30	30	19.4538
0.596252	0.472441	0.327103		35	30	35	24.1514
0.511073	0.472441	0.373832		30	30	40	24.8938
0.425894	0.472441	0.420561		25	30	45	25.664
0.340716	0.472441	0.46729		20	30	50	34.5318
0.255537	0.472441	0.514019		15	30	55	44.7207
0.170358	0.472441	0.560748		10	30	60	21.4278
0.0851789	0.472441	0.607477		5	30	65	12.3067
0.936968	0.629921	0.046729		55	40	5	5.82036
0.851789	0.629921	0.0934579		50	40	10	5.97375
0.76661	0.629921	0.140187		45	40	15	6.99816
0.681431	0.629921	0.186916		40	40	20	9.93823
0.596252	0.629921	0.233645		35	40	25	17.2088
0.511073	0.629921	0.280374		30	40	30	22.2742
0.425894	0.629921	0.327103		25	40	35	26.7349
0.340716	0.629921	0.373832		20	40	40	37.6163
0.255537	0.629921	0.420561		15	40	45	48.3136
0.170358	0.629921	0.46729		10	40	50	24.625
0.0851789	0.629921	0.514019		5	40	55	14.7346
0.76661	0.787402	0.046729		45	50	5	3.47888
0.681431	0.787402	0.0934579		40	50	10	3.63554
0.596252	0.787402	0.140187		35	50	15	7.48743
0.511073	0.787402	0.186916		30	50	20	11.5597
0.425894	0.787402	0.233645		25	50	25	18.6678
0.340716	0.787402	0.280374		20	50	30	33.961
0.255537	0.787402	0.327103		15	50	35	48.4091
0.170358	0.787402	0.373832		10	50	40	26.7527
0.0851789	0.787402	0.420561		5	50	45	17.3577
0.596252	0.944882	0.046729		35	60	5	4.59844
0.511073	0.944882	0.0934579		30	60	10	5.82697
0.425894	0.944882	0.140187		25	60	15	9.43699
0.340716	0.944882	0.186916		20	60	20	23.697
0.255537	0.944882	0.233645		15	60	25	40.8202
0.170358	0.944882	0.280374		10	60	30	23.6441
0.0851789	0.944882	0.327103		5	60	35	18.0675
0.425894	1.10236	0.046729		25	70	5	7.28865
0.340716	1.10236	0.0934579		20	70	10	18.661
0.255537	1.10236	0.140187		15	70	15	32.2263
0.170358	1.10236	0.186916		10	70	20	13.9804
0.0851789	1.10236	0.233645		5	70	25	11.0873
0.255537	1.25984	0.046729		15	80	5	30.5372
0.170358	1.25984	0.0934579		10	80	10	9.37959
0.0851789	1.25984	0.140187		5	80	15	2.89505
0.0851789	1.41732	0.046729		5	90	5	1.44315

## Sheet: Sheet7
									PNP		1E4*Catlytic activity /Ni
mole ratio				Wt% ratio			Syn/Ni		Time to reach 100%(min)	Time (sec)				simulated particle size(nm)
Ni	Cu	Ag		Ni%	%Cu	%Ag	24.1834							13.9159
1	1	1		25.6108	27.7051	46.6841			4.57753	274.652	1.42165
									oNP					Simulated metal surface area (m2/g)
									Time to reach 100%(min)	Time (sec)				10.1095
									1.34793	80.8757	4.8279			Degree of dispersion
														30.3356
									mNP
									Time to reach 100%(min)	Time (sec)				Average crystallite size(nm)
														3.40442
									0.72372	43.4232	8.99197

## Sheet: Sheet8
mole ratio				Wt% ratio															simulated linear				real syn	real correction	real correction2	real syn	real cat reponse	time	time (min)
Ni	Cu	Ag		Ni%	%Cu	%Ag	time (sec)	time(min)	catlytic activity response	linear catalytioc activity response per unit nickel	%syn	%Syn/Ni		simulated Syn of Cu	simulated syn of Ag	corrected simulated cu	corrected simulated Ag	linear addition syn(Cu,Ag)	time(sec)	time(min)		simulated function 3 dimensional
1	0	0		100	0	0	80	1.33333	0.0125	0.000125	0	0		#DIV/0!	0.0101661	0	0	0	80	1.33333		0.00177524	0	0.794544	0.00177524	0.177524	0.0125222	79.8582	1.33097
1	1	1		25.6108	27.7051	46.6841	240	4	0.00416667		30.1533	1.17737		6.74156	11.8881	6.74156	11.8881	18.6296	263.314	4.38856		18.2424	28.2388	24.1834	24.1834	619.357	0.0230292	43.4232	0.72372
2	1	0		64.8977	35.1023	0	150	2.5	0.00666667		-17.8194	-0.274577		6.45949	0.0101661	6.45949	0	6.45949	115.791	1.92986		6.75292	6.46852	7.93586	6.75292	438.249	0.043664	22.9022	0.381703			mNP
2	0	1		52.3173	0	47.6827	140	2.33333	0.00714286		9.22366	0.176302		#DIV/0!	11.3036	0	11.3036	11.3036	137.384	2.28973		11.7134	11.2934	13.2309	11.7134	612.814	0.0466156	21.452	0.357534
1	1	0		48.036	51.964	0	452	7.53333	0.00221239		-63.1545	-1.31473		2.76453	0.0101661	2.76453	0	2.76453	162.061	2.70102		3.07186	2.76975	4.76806	3.07186	147.56	0.0148647	67.2734	1.12122
1	0	1		35.4255	0	64.5745	598	9.96667	0.00167224		-62.2364	-1.75683		#DIV/0!	3.92474	0	3.92474	3.92474	217.298	3.62163		4.43788	3.91963	7.18082	7.18082	254.384	0.0156928	63.7236	1.06206
1	2	0		31.6101	68.3899	0	1100	18.3333	0.000909091		-76.9924	-2.43569		1.40096	0.0101661	1.40096	0	1.40096	249.587	4.15978		0.96801	1.44014	4.41342	4.41342	139.509	0.00946362	105.668	1.76113
1	0	2		21.5255	0	78.4745	1500	25	0.000666667		-75.2232	-3.49461		#DIV/0!	2.59941	0	2.59941	2.59941	362.236	6.03727		1.67135	2.63471	13.4553	13.4553	289.632	0.0104838	95.3856	1.58976
1	0.1	0		90.2383	9.76172	0	355	5.91667	0.0028169		-75.027	-0.831432		0.64015	0.0101661	0.64015	0	0.64015	88.0903	1.46817		0.445501	0.642236	1.30909	0.445501	40.2012	0.0158144	63.2335	1.05389
1	0	0.1		84.5821	0	15.4179	230	3.83333	0.00434783		-58.8771	-0.696094		#DIV/0!	1.89745	0	1.89745	1.89745	92.8214	1.54702		1.42144	1.89286	2.33537	1.42144	120.228	0.0232842	42.9475	0.715792
1	1	2		17.4598	18.8876	63.6526	327	5.45	0.0030581		40.1206	2.29788		3.11049	4.14239	3.11049	4.14239	7.25288	427.209	7.12015		8.14204	45.0326	45.0016	45.0016	785.721	0.0193307	51.7312	0.862187
1	2	1		20.0547	43.3891	36.5562	322	5.36667	0.00310559		23.885	1.19099		4.30594	15.435	4.30594	15.435	19.7409	333.144	5.5524		19.7217	34.0855	37.0723	37.0723	743.472	0.0211444	47.2938	0.78823
2	1	1		40.778	22.0563	37.1657	136	2.26667	0.00735294		44.2529	1.08521		4.52761	15.4431	4.52761	15.4431	19.9707	163.527	2.72544		19.7081	19.9225	21.8636	19.7081	803.66	0.0460618	21.7099	0.361832
1	0.0198	0.029		93.0855	1.99381	4.92069	400	6.66667	0.0025		-78.5144	-0.843465		0.0238102	0.0828505	0.0238102	0.0828505	0.106661	85.8509	1.43085		0.0153193	28.2388	0.856389	0.0153193	1.42601	0.0118016	84.7342	1.41224
1	0.029	0.314		62.3543	1.95614	35.6896		0	#DIV/0!		#DIV/0!	#DIV/0!		0.0229146	15.3564	0.0229146	15.3564	15.3793	111.198	1.8533		15.3527	10.4704	16.5879	15.3527	957.308	0.0824096	12.1345	0.202242
3	1	1		50.8078	18.3208	30.8713		0	#DIV/0!		#DIV/0!	#DIV/0!		2.88175	13.4694	2.88175	13.4694	16.3512	135.328	2.25547		16.6981		18.2732	16.6981	848.395	0.0602324	16.6024	0.276706
1	2	3		11.5848	25.0641	63.3511		0	#DIV/0!		#DIV/0!	#DIV/0!		5.87669	4.2179	5.87669	4.2179	10.0946	627.244	10.4541		10.6674		24.9792	24.9792	289.379	0.00563857	177.35	2.95583
4	2	1		50.0853	27.0904	22.8242		0	#DIV/0!		#DIV/0!	#DIV/0!		6.58235	6.78632	6.58235	6.78632	13.3687	140.892	2.3482		13.1491		14.7537	13.1491	658.578	0.047492	21.0562	0.350936
1	4	1		13.9862	60.5194	25.4944		0	#DIV/0!		#DIV/0!	#DIV/0!		1.88833	9.1626	1.88833	9.1626	11.0509	515.073	8.58455		11.0997		35.5587	35.5587	497.33	0.010443	95.7584	1.59597
1	1	4		10.6688	11.5413	77.7899		0	#DIV/0!		#DIV/0!	#DIV/0!		0.936176	2.58803	0.936176	2.58803	3.5242	724.32	12.072		2.53419		13.4909	13.4909	143.933	0.0032531	307.399	5.12332
2	3	1		28.296	45.9147	25.7893		0	#DIV/0!		#DIV/0!	#DIV/0!		3.76131	9.42736	3.76131	9.42736	13.1887	249.783	4.16305		13.8232		18.2971	18.2971	517.733	0.0218492	45.7683	0.762804
3	1	1		50.8078	18.3208	30.8713		0	#DIV/0!		#DIV/0!	#DIV/0!		2.88175	13.4694	2.88175	13.4694	16.3512	135.328	2.25547		16.6981		18.2732	16.6981	848.395	0.0602324	16.6024	0.276706
1	4	5		6.92462	29.9634	63.1119		0	#DIV/0!		#DIV/0!	#DIV/0!		7.06498	4.27934	7.06498	4.27934	11.3443	1037.59	17.2932		11.5943		14.3946	14.3946	99.6771	0.00172836	578.583	9.64306
2	1	1		40.778	22.0563	37.1657		0	#DIV/0!		#DIV/0!	#DIV/0!		4.52761	15.4431	4.52761	15.4431	19.9707	163.527	2.72544		19.7081		21.8636	19.7081	803.66	0.0460618	21.7099	0.361832
3	2	1		42.9407	30.9681	26.0912		0	#DIV/0!		#DIV/0!	#DIV/0!		7.07577	9.6972	7.07577	9.6972	16.773	159.543	2.65905		16.5093		18.4995	16.5093	708.923	0.0434197	23.031	0.383851
1	2	6		7.09194	15.3437	77.5643		0	#DIV/0!		#DIV/0!	#DIV/0!		1.84956	2.58611	1.84956	2.58611	4.43567	1080.13	18.0022		3.75747		6.75013	6.75013	47.8715	0.00131087	762.852	12.7142
1.44804	0.15748	0.046729		85	10	5		0	#DIV/0!		#DIV/0!	#DIV/0!		0.675626	0.0853988	0.675626	0.0853988	0.761025	93.4068	1.55678		0.49154		1.40147	0.49154	41.7809	0.0150642	66.3824	1.10637
0.851789	0.314961	0.280374		50	20	30		0	#DIV/0!		#DIV/0!	#DIV/0!		3.58556	12.8884	3.58556	12.8884	16.474	137.37	2.2895		16.8723		18.4805	16.8723	843.616	0.058976	16.956	0.282601
0.681431	0.629921	0.186916		40	40	20		0	#DIV/0!		#DIV/0!	#DIV/0!		5.15742	4.52422	5.15742	4.52422	9.68164	182.346	3.0391		9.93823		12.1611	9.93823	397.529	0.0248765	40.1986	0.669977
0.936968	0.0787402	0.373832		55	5	40		0	#DIV/0!		#DIV/0!	#DIV/0!		0.15384	15.0097	0.15384	15.0097	15.1635	126.303	2.10504		14.9646		16.3915	14.9646	823.056	0.0634601	15.7579	0.262632
1.10733	0.23622	0.186916		65	15	20		0	#DIV/0!		#DIV/0!	#DIV/0!		1.74912	4.52422	1.74912	4.52422	6.27335	115.812	1.93019		6.14329		7.32425	6.14329	399.314	0.0405693	24.6492	0.41082
0.76661	0.629921	0.140187		45	40	15		0	#DIV/0!		#DIV/0!	#DIV/0!		5.15742	1.7287	5.15742	1.7287	6.88612	166.324	2.77207		6.99816		8.856	6.99816	314.917	0.0233391	42.8466	0.714109
0.255537	1.25984	0.046729		15	80	5		0	#DIV/0!		#DIV/0!	#DIV/0!		0.967255	0.0853988	0.967255	0.0853988	1.05265	527.778	8.79629		0.407334		30.5372	30.5372	458.058	0.0104636	95.5694	1.59282
1.1925	0.314961	0.0934579		70	20	10		0	#DIV/0!		#DIV/0!	#DIV/0!		3.58556	0.466657	3.58556	0.466657	4.05222	109.835	1.83058		4.25195		5.34564	4.25195	297.637	0.0347932	28.7412	0.479021
0.170358	1.10236	0.186916		10	70	20		0	#DIV/0!		#DIV/0!	#DIV/0!		1.32483	4.52422	1.32483	4.52422	5.84906	755.793	12.5966		5.16911		13.9804	13.9804	139.804	0.00299755	333.606	5.56009
1.60136	0.015748	0.046729		94	1	5		0	#DIV/0!		#DIV/0!	#DIV/0!		0.00596659	0.0853988	0.00596659	0.0853988	0.0913654	85.0287	1.41714		0.0115097		0.845699	0.0115097	1.08191	0.0118771	84.1955	1.40326
1.46508	0.15748	0.0373832		86	10	4		0	#DIV/0!		#DIV/0!	#DIV/0!		0.675626	0.0578237	0.675626	0.0578237	0.73345	92.3459	1.5391		0.487372		1.38791	0.487372	41.914	0.0152558	65.549	1.09248
0.596252	0.944882	0.046729		35	60	5		0	#DIV/0!		#DIV/0!	#DIV/0!		1.92907	0.0853988	1.92907	0.0853988	2.01447	224.058	3.7343		1.7928		4.59844	4.59844	160.946	0.0114164	87.5935	1.45989
1.02215	0.472441	0.0934579		60	30	10		0	#DIV/0!		#DIV/0!	#DIV/0!		7.06677	0.466657	7.06677	0.466657	7.53343	123.992	2.06654		7.16328		8.45241	7.16328	429.797	0.0397348	25.1669	0.419448
0.511073	0.787402	0.186916		30	50	20		0	#DIV/0!		#DIV/0!	#DIV/0!		3.04527	4.52422	3.04527	4.52422	7.56949	247.902	4.1317		7.68454		11.5597	11.5597	346.791	0.0167547	59.6849	0.994749
1.53322	0.0787402	0.046729		90	5	5		0	#DIV/0!		#DIV/0!	#DIV/0!		0.15384	0.0853988	0.15384	0.0853988	0.239239	88.6767	1.47795		0.061433		0.926984	0.061433	5.52897	0.011872	84.2317	1.40386
1.1925	0.267717	0.121495		70	17	13		0	#DIV/0!		#DIV/0!	#DIV/0!		2.38782	1.0699	2.38782	1.0699	3.45772	110.466	1.8411		3.31479		4.40848	3.31479	232.036	0.0290531	34.4197	0.573662
0.477002	0.188976	0.560748		28	12	60		0	#DIV/0!		#DIV/0!	#DIV/0!		1.02485	5.21066	1.02485	5.21066	6.2355	268.944	4.4824		6.83072		11.4289	11.4289	320.01	0.0147004	68.0255	1.13376
0.76661	0.23622	0.373832		45	15	40		0	#DIV/0!		#DIV/0!	#DIV/0!		1.74912	15.0097	1.74912	15.0097	16.7588	152.261	2.53768		16.5466		18.4045	16.5466	744.598	0.0475087	21.0488	0.350813
0.681431	0.787402	0.0934579		40	50	10		0	#DIV/0!		#DIV/0!	#DIV/0!		3.04527	0.466657	3.04527	0.466657	3.51193	193.214	3.22024		3.63554		5.85844	3.63554	145.422	0.0122711	81.4924	1.35821
0.76661	0.629921	0.140187		45	40	15		0	#DIV/0!		#DIV/0!	#DIV/0!		5.15742	1.7287	5.15742	1.7287	6.88612	166.324	2.77207		6.99816		8.856	6.99816	314.917	0.0233391	42.8466	0.714109
0.851789	0.472441	0.186916		50	30	20		0	#DIV/0!		#DIV/0!	#DIV/0!		7.06677	4.52422	7.06677	4.52422	11.591	143.381	2.38968		11.0848		12.693	11.0848	554.238	0.0408899	24.4559	0.407599
0.851789	0.393701	0.233645		50	25	25		0	#DIV/0!		#DIV/0!	#DIV/0!		5.85063	8.71757	5.85063	8.71757	14.5682	139.655	2.32758		14.6587		16.2669	14.6587	732.937	0.0520586	19.2091	0.320152
0.936968	0.23622	0.280374		55	15	30		0	#DIV/0!		#DIV/0!	#DIV/0!		1.74912	12.8884	1.74912	12.8884	14.6375	126.882	2.1147		14.9079		16.3347	14.9079	819.933	0.0632454	15.8114	0.263524
0.851789	0.15748	0.373832		50	10	40		0	#DIV/0!		#DIV/0!	#DIV/0!		0.675626	15.0097	0.675626	15.0097	15.6853	138.306	2.3051		15.3393		16.9475	15.3393	766.965	0.0541853	18.4552	0.307586
1.44804	0.0787402	0.0934579		85	5	10		0	#DIV/0!		#DIV/0!	#DIV/0!		0.15384	0.466657	0.15384	0.466657	0.620497	93.5373	1.55895		0.22287		1.13279	0.22287	18.9439	0.0126378	79.1277	1.3188
1.36286	0.0787402	0.140187		80	5	15		0	#DIV/0!		#DIV/0!	#DIV/0!		0.15384	1.7287	0.15384	1.7287	1.88254	98.1522	1.63587		1.301		2.26236	1.301	104.08	0.020408	49.0004	0.816674
1.27768	0.0787402	0.186916		75	5	20		0	#DIV/0!		#DIV/0!	#DIV/0!		0.15384	4.52422	0.15384	4.52422	4.67806	101.9	1.69833		4.39524		5.41697	4.39524	329.643	0.040279	24.8268	0.413781
1.1925	0.0787402	0.233645		70	5	25		0	#DIV/0!		#DIV/0!	#DIV/0!		0.15384	8.71757	0.15384	8.71757	8.87141	104.973	1.74955		9.09427		10.188	9.09427	636.599	0.0644524	15.5153	0.258589
1.10733	0.0787402	0.280374		65	5	30	150	2.5	0.00666667		-17.9487	-0.276134		0.15384	12.8884	0.15384	12.8884	13.0423	108.877	1.81462		13.2997		14.4807	13.2997	864.482	0.0783642	12.7609	0.212682
1.02215	0.0787402	0.327103		60	5	35		0	#DIV/0!		#DIV/0!	#DIV/0!		0.15384	15.2364	0.15384	15.2364	15.3903	115.55	1.92583		15.3127		16.6018	15.3127	918.763	0.0764072	13.0878	0.21813
0.936968	0.0787402	0.373832		55	5	40		0	#DIV/0!		#DIV/0!	#DIV/0!		0.15384	15.0097	0.15384	15.0097	15.1635	126.303	2.10504		14.9646		16.3915	14.9646	823.056	0.0634601	15.7579	0.262632
0.851789	0.0787402	0.420561		50	5	45		0	#DIV/0!		#DIV/0!	#DIV/0!		0.15384	12.8408	0.15384	12.8408	12.9946	141.6	2.35999		13.0731		14.6813	13.0731	653.656	0.0471035	21.2298	0.353831
0.76661	0.0787402	0.46729		45	5	50		0	#DIV/0!		#DIV/0!	#DIV/0!		0.15384	9.94185	0.15384	9.94185	10.0957	161.476	2.69126		10.5788		12.4367	10.5788	476.047	0.0324026	30.8617	0.514362
0.681431	0.0787402	0.514019		40	5	55		0	#DIV/0!		#DIV/0!	#DIV/0!		0.15384	7.25982	0.15384	7.25982	7.41366	186.196	3.10327		8.1256		10.3485	8.1256	325.024	0.0212512	47.0562	0.784269
0.596252	0.0787402	0.560748		35	5	60		0	#DIV/0!		#DIV/0!	#DIV/0!		0.15384	5.21066	0.15384	5.21066	5.3645	216.934	3.61557		6.02497		8.83061	8.83061	309.072	0.0178969	55.8757	0.931261
0.511073	0.0787402	0.607477		30	5	65		0	#DIV/0!		#DIV/0!	#DIV/0!		0.15384	3.83084	0.15384	3.83084	3.98468	256.448	4.27413		4.36339		8.23854	8.23854	247.156	0.0130184	76.8146	1.28024
0.425894	0.0787402	0.654206		25	5	70		0	#DIV/0!		#DIV/0!	#DIV/0!		0.15384	3.00645	0.15384	3.00645	3.16029	310.197	5.16995		3.11211		9.5353	9.5353	238.382	0.0105745	94.5675	1.57613
0.340716	0.0787402	0.700935		20	5	75		0	#DIV/0!		#DIV/0!	#DIV/0!		0.15384	2.62483	0.15384	2.62483	2.77867	389.186	6.48643		2.19922		19.8345	19.8345	396.69	0.0124172	80.5331	1.34222
0.255537	0.0787402	0.747664		15	5	80		0	#DIV/0!		#DIV/0!	#DIV/0!		0.15384	2.65681	0.15384	2.65681	2.81065	518.753	8.64588		1.54698		31.6769	31.6769	475.153	0.0107841	92.7289	1.54548
0.170358	0.0787402	0.794393		10	5	85		0	#DIV/0!		#DIV/0!	#DIV/0!		0.15384	3.24904	0.15384	3.24904	3.40288	773.673	12.8945		1.08743		9.89872	9.89872	98.9872	0.00248734	402.036	6.7006
0.0851789	0.0787402	0.841121		5	5	90		0	#DIV/0!		#DIV/0!	#DIV/0!		0.15384	5.00282	0.15384	5.00282	5.15666	1521.54	25.359		0.766666		2.01852	2.01852	10.0926	0.000688079	1453.32	24.222
1.44804	0.15748	0.046729		85	10	5		0	#DIV/0!		#DIV/0!	#DIV/0!		0.675626	0.0853988	0.675626	0.0853988	0.761025	93.4068	1.55678		0.49154		1.40147	0.49154	41.7809	0.0150642	66.3824	1.10637
1.36286	0.15748	0.0934579		80	10	10		0	#DIV/0!		#DIV/0!	#DIV/0!		0.675626	0.466657	0.675626	0.466657	1.14228	98.8706	1.64784		0.652377		1.61374	0.652377	52.1901	0.015219	65.7073	1.09512
1.27768	0.15748	0.140187		75	10	15		0	#DIV/0!		#DIV/0!	#DIV/0!		0.675626	1.7287	0.675626	1.7287	2.40433	104.162	1.73604		1.72649		2.74823	1.72649	129.487	0.0215144	46.4805	0.774675
1.1925	0.15748	0.186916		70	10	20		0	#DIV/0!		#DIV/0!	#DIV/0!		0.675626	4.52422	0.675626	4.52422	5.19985	108.637	1.81061		4.80922		5.9029	4.80922	336.645	0.0382065	26.1736	0.436227
1.10733	0.15748	0.233645		65	10	25		0	#DIV/0!		#DIV/0!	#DIV/0!		0.675626	8.71757	0.675626	8.71757	9.39319	112.509	1.87515		9.49076		10.6717	9.49076	616.9	0.0582481	17.1679	0.286132
1.02215	0.15748	0.280374		60	10	30		0	#DIV/0!		#DIV/0!	#DIV/0!		0.675626	12.8884	0.675626	12.8884	13.564	117.408	1.9568		13.6806		14.9697	13.6806	820.834	0.0690626	14.4796	0.241327
0.936968	0.15748	0.327103		55	10	35		0	#DIV/0!		#DIV/0!	#DIV/0!		0.675626	15.2364	0.675626	15.2364	15.9121	125.487	2.09145		15.6861		17.1129	15.6861	862.734	0.0661879	15.1085	0.251808
0.851789	0.15748	0.373832		50	10	40		0	#DIV/0!		#DIV/0!	#DIV/0!		0.675626	15.0097	0.675626	15.0097	15.6853	138.306	2.3051		15.3393		16.9475	15.3393	766.965	0.0541853	18.4552	0.307586
0.76661	0.15748	0.420561		45	10	45		0	#DIV/0!		#DIV/0!	#DIV/0!		0.675626	12.8408	0.675626	12.8408	13.5164	156.61	2.61016		13.4548		15.3126	13.4548	605.466	0.0396825	25.2	0.420001
0.681431	0.15748	0.46729		40	10	50		0	#DIV/0!		#DIV/0!	#DIV/0!		0.675626	9.94185	0.675626	9.94185	10.6175	180.803	3.01339		10.9698		13.1927	10.9698	438.791	0.0269396	37.1201	0.618669
0.596252	0.15748	0.514019		35	10	55		0	#DIV/0!		#DIV/0!	#DIV/0!		0.675626	7.25982	0.675626	7.25982	7.93544	211.767	3.52945		8.5257		11.3313	11.3313	396.597	0.0217261	46.0276	0.767126
0.511073	0.15748	0.560748		30	10	60		0	#DIV/0!		#DIV/0!	#DIV/0!		0.675626	5.21066	0.675626	5.21066	5.88628	251.843	4.19738		6.43289		10.308	10.308	309.241	0.0153465	65.1613	1.08602
0.425894	0.15748	0.607477		25	10	65		0	#DIV/0!		#DIV/0!	#DIV/0!		0.675626	3.83084	0.675626	3.83084	4.50646	306.201	5.10335		4.77749		11.2007	11.2007	280.017	0.0118755	84.2068	1.40345
0.340716	0.15748	0.654206		20	10	70		0	#DIV/0!		#DIV/0!	#DIV/0!		0.675626	3.00645	0.675626	3.00645	3.68208	385.795	6.42991		3.53087		21.1661	21.1661	423.323	0.0130831	76.4347	1.27391
0.255537	0.15748	0.700935		15	10	75		0	#DIV/0!		#DIV/0!	#DIV/0!		0.675626	2.62483	0.675626	2.62483	3.30046	516.293	8.60489		2.62137		32.7513	32.7513	491.269	0.0110863	90.2015	1.50336
0.170358	0.15748	0.747664		10	10	80		0	#DIV/0!		#DIV/0!	#DIV/0!		0.675626	2.65681	0.675626	2.65681	3.33243	774.2	12.9033		1.97156		10.7829	10.7829	107.829	0.00259786	384.933	6.41554
0.0851789	0.15748	0.794393		5	10	85		0	#DIV/0!		#DIV/0!	#DIV/0!		0.675626	3.24904	0.675626	3.24904	3.92467	1539.58	25.6596		1.51372		2.76557	2.76557	13.8279	0.000711424	1405.63	23.4272
1.27768	0.314961	0.046729		75	20	5		0	#DIV/0!		#DIV/0!	#DIV/0!		3.58556	0.0853988	3.58556	0.0853988	3.67096	102.89	1.71483		4.09615		5.11789	4.09615	307.211	0.0381761	26.1944	0.436574
1.1925	0.314961	0.0934579		70	20	10		0	#DIV/0!		#DIV/0!	#DIV/0!		3.58556	0.466657	3.58556	0.466657	4.05222	109.835	1.83058		4.25195		5.34564	4.25195	297.637	0.0347932	28.7412	0.479021
1.10733	0.314961	0.140187		65	20	15		0	#DIV/0!		#DIV/0!	#DIV/0!		3.58556	1.7287	3.58556	1.7287	5.31426	116.866	1.94777		5.29245		6.4734	5.29245	344.009	0.0360757	27.7195	0.461991
1.02215	0.314961	0.186916		60	20	20		0	#DIV/0!		#DIV/0!	#DIV/0!		3.58556	4.52422	3.58556	4.52422	8.10978	123.331	2.05552		8.27867		9.5678	8.27867	496.72	0.044754	22.3444	0.372406
0.936968	0.314961	0.233645		55	20	25		0	#DIV/0!		#DIV/0!	#DIV/0!		3.58556	8.71757	3.58556	8.71757	12.3031	129.52	2.15866		12.8137		14.2405	12.8137	704.752	0.0553267	18.0745	0.301241
0.851789	0.314961	0.280374		50	20	30		0	#DIV/0!		#DIV/0!	#DIV/0!		3.58556	12.8884	3.58556	12.8884	16.474	137.37	2.2895		16.8723		18.4805	16.8723	843.616	0.058976	16.956	0.282601
0.76661	0.314961	0.327103		45	20	35		0	#DIV/0!		#DIV/0!	#DIV/0!		3.58556	15.2364	3.58556	15.2364	18.822	149.617	2.49361		18.815		20.6729	18.815	846.677	0.0532506	18.7791	0.312986
0.681431	0.314961	0.373832		40	20	40		0	#DIV/0!		#DIV/0!	#DIV/0!		3.58556	15.0097	3.58556	15.0097	18.5953	168.641	2.81068		18.4791		20.702	18.4791	739.165	0.0419583	23.8332	0.39722
0.596252	0.314961	0.420561		35	20	45		0	#DIV/0!		#DIV/0!	#DIV/0!		3.58556	12.8408	3.58556	12.8408	16.4263	196.323	3.27205		16.6536		19.4593	19.4593	681.074	0.034172	29.2637	0.487729
0.511073	0.314961	0.46729		30	20	50		0	#DIV/0!		#DIV/0!	#DIV/0!		3.58556	9.94185	3.58556	9.94185	13.5274	234.892	3.91486		14.2464		18.1215	18.1215	543.646	0.0241367	41.4306	0.69051
0.425894	0.314961	0.514019		25	20	55		0	#DIV/0!		#DIV/0!	#DIV/0!		3.58556	7.25982	3.58556	7.25982	10.8454	288.69	4.81151		11.8788		18.302	18.302	457.55	0.0174234	57.3939	0.956566
0.340716	0.314961	0.560748		20	20	60		0	#DIV/0!		#DIV/0!	#DIV/0!		3.58556	5.21066	3.58556	5.21066	8.79622	367.66	6.12766		9.85152		27.4868	27.4868	549.736	0.0162434	61.5635	1.02606
0.255537	0.314961	0.607477		15	20	65		0	#DIV/0!		#DIV/0!	#DIV/0!		3.58556	3.83084	3.58556	3.83084	7.41639	496.51	8.27517		8.24794		38.3778	38.3778	575.667	0.0126688	78.9343	1.31557
0.170358	0.314961	0.654206		10	20	70		0	#DIV/0!		#DIV/0!	#DIV/0!		3.58556	3.00645	3.58556	3.00645	6.59201	750.525	12.5088		7.04034		15.8516	15.8516	158.516	0.00323145	309.458	5.15764
0.0851789	0.314961	0.700935		5	20	75		0	#DIV/0!		#DIV/0!	#DIV/0!		3.58556	2.62483	3.58556	2.62483	6.21039	1506.44	25.1074		6.15932		7.41117	7.41117	37.0559	0.000856599	1167.41	19.4568
1.10733	0.472441	0.046729		65	30	5		0	#DIV/0!		#DIV/0!	#DIV/0!		7.06677	0.0853988	7.06677	0.0853988	7.15217	114.862	1.91436		7.01155		8.19251	7.01155	455.751	0.0451548	22.1461	0.369101
1.02215	0.472441	0.0934579		60	30	10		0	#DIV/0!		#DIV/0!	#DIV/0!		7.06677	0.466657	7.06677	0.466657	7.53343	123.992	2.06654		7.16328		8.45241	7.16328	429.797	0.0397348	25.1669	0.419448
0.936968	0.472441	0.140187		55	30	15		0	#DIV/0!		#DIV/0!	#DIV/0!		7.06677	1.7287	7.06677	1.7287	8.79547	133.695	2.22826		8.17658		9.60342	8.17658	449.712	0.0377927	26.4601	0.441002
0.851789	0.472441	0.186916		50	30	20		0	#DIV/0!		#DIV/0!	#DIV/0!		7.06677	4.52422	7.06677	4.52422	11.591	143.381	2.38968		11.0848		12.693	11.0848	554.238	0.0408899	24.4559	0.407599
0.76661	0.472441	0.233645		45	30	25		0	#DIV/0!		#DIV/0!	#DIV/0!		7.06677	8.71757	7.06677	8.71757	15.7843	153.542	2.55904		15.5012		17.3591	15.5012	697.555	0.0448625	22.2903	0.371506
0.681431	0.472441	0.280374		40	30	30		0	#DIV/0!		#DIV/0!	#DIV/0!		7.06677	12.8884	7.06677	12.8884	19.9552	166.729	2.77882		19.4538		21.6767	19.4538	778.153	0.0439076	22.7751	0.379585
0.596252	0.472441	0.327103		35	30	35		0	#DIV/0!		#DIV/0!	#DIV/0!		7.06677	15.2364	7.06677	15.2364	22.3032	186.889	3.11482		21.3458		24.1514	24.1514	845.299	0.0413568	24.1798	0.402997
0.511073	0.472441	0.373832		30	30	40		0	#DIV/0!		#DIV/0!	#DIV/0!		7.06677	15.0097	7.06677	15.0097	22.0765	218.442	3.64071		21.0186		24.8938	24.8938	746.813	0.0317555	31.4906	0.524844
0.425894	0.472441	0.420561		25	30	45		0	#DIV/0!		#DIV/0!	#DIV/0!		7.06677	12.8408	7.06677	12.8408	19.9075	266.872	4.44787		19.2408		25.664	25.664	641.6	0.023175	43.1499	0.719165
0.340716	0.472441	0.46729		20	30	50		0	#DIV/0!		#DIV/0!	#DIV/0!		7.06677	9.94185	7.06677	9.94185	17.0086	341.855	5.69759		16.8965		34.5318	34.5318	690.636	0.0197659	50.5922	0.843203
0.255537	0.472441	0.514019		15	30	55		0	#DIV/0!		#DIV/0!	#DIV/0!		7.06677	7.25982	7.06677	7.25982	14.3266	466.5	7.775		14.5908		44.7207	44.7207	670.811	0.0144527	69.1912	1.15319
0.170358	0.472441	0.560748		10	30	60		0	#DIV/0!		#DIV/0!	#DIV/0!		7.06677	5.21066	7.06677	5.21066	12.2774	712.521	11.8753		12.6165		21.4278	21.4278	214.278	0.00392847	254.552	4.24253
0.0851789	0.472441	0.607477		5	30	65		0	#DIV/0!		#DIV/0!	#DIV/0!		7.06677	3.83084	7.06677	3.83084	10.8976	1442.77	24.0462		11.0548		12.3067	12.3067	61.5334	0.00100958	990.507	16.5085
0.936968	0.629921	0.046729		55	40	5		0	#DIV/0!		#DIV/0!	#DIV/0!		5.15742	0.0853988	5.15742	0.0853988	5.24282	138.209	2.30348		5.82036		7.2472	5.82036	320.12	0.0288832	34.6222	0.577036
1.02215	0.472441	0.0934579		60	30	10		0	#DIV/0!		#DIV/0!	#DIV/0!		7.06677	0.466657	7.06677	0.466657	7.53343	123.992	2.06654		7.16328		8.45241	7.16328	429.797	0.0397348	25.1669	0.419448
0.936968	0.472441	0.140187		55	30	15		0	#DIV/0!		#DIV/0!	#DIV/0!		7.06677	1.7287	7.06677	1.7287	8.79547	133.695	2.22826		8.17658		9.60342	8.17658	449.712	0.0377927	26.4601	0.441002
0.851789	0.472441	0.186916		50	30	20		0	#DIV/0!		#DIV/0!	#DIV/0!		7.06677	4.52422	7.06677	4.52422	11.591	143.381	2.38968		11.0848		12.693	11.0848	554.238	0.0408899	24.4559	0.407599
0.76661	0.472441	0.233645		45	30	25		0	#DIV/0!		#DIV/0!	#DIV/0!		7.06677	8.71757	7.06677	8.71757	15.7843	153.542	2.55904		15.5012		17.3591	15.5012	697.555	0.0448625	22.2903	0.371506
0.681431	0.472441	0.280374		40	30	30		0	#DIV/0!		#DIV/0!	#DIV/0!		7.06677	12.8884	7.06677	12.8884	19.9552	166.729	2.77882		19.4538		21.6767	19.4538	778.153	0.0439076	22.7751	0.379585
0.596252	0.472441	0.327103		35	30	35		0	#DIV/0!		#DIV/0!	#DIV/0!		7.06677	15.2364	7.06677	15.2364	22.3032	186.889	3.11482		21.3458		24.1514	24.1514	845.299	0.0413568	24.1798	0.402997
0.511073	0.472441	0.373832		30	30	40		0	#DIV/0!		#DIV/0!	#DIV/0!		7.06677	15.0097	7.06677	15.0097	22.0765	218.442	3.64071		21.0186		24.8938	24.8938	746.813	0.0317555	31.4906	0.524844
0.425894	0.472441	0.420561		25	30	45		0	#DIV/0!		#DIV/0!	#DIV/0!		7.06677	12.8408	7.06677	12.8408	19.9075	266.872	4.44787		19.2408		25.664	25.664	641.6	0.023175	43.1499	0.719165
0.340716	0.472441	0.46729		20	30	50		0	#DIV/0!		#DIV/0!	#DIV/0!		7.06677	9.94185	7.06677	9.94185	17.0086	341.855	5.69759		16.8965		34.5318	34.5318	690.636	0.0197659	50.5922	0.843203
0.255537	0.472441	0.514019		15	30	55		0	#DIV/0!		#DIV/0!	#DIV/0!		7.06677	7.25982	7.06677	7.25982	14.3266	466.5	7.775		14.5908		44.7207	44.7207	670.811	0.0144527	69.1912	1.15319
0.170358	0.472441	0.560748		10	30	60		0	#DIV/0!		#DIV/0!	#DIV/0!		7.06677	5.21066	7.06677	5.21066	12.2774	712.521	11.8753		12.6165		21.4278	21.4278	214.278	0.00392847	254.552	4.24253
0.0851789	0.472441	0.607477		5	30	65		0	#DIV/0!		#DIV/0!	#DIV/0!		7.06677	3.83084	7.06677	3.83084	10.8976	1442.77	24.0462		11.0548		12.3067	12.3067	61.5334	0.00100958	990.507	16.5085
0.936968	0.629921	0.046729		55	40	5		0	#DIV/0!		#DIV/0!	#DIV/0!		5.15742	0.0853988	5.15742	0.0853988	5.24282	138.209	2.30348		5.82036		7.2472	5.82036	320.12	0.0288832	34.6222	0.577036
1.02215	0.472441	0.0934579		60	30	10		0	#DIV/0!		#DIV/0!	#DIV/0!		7.06677	0.466657	7.06677	0.466657	7.53343	123.992	2.06654		7.16328		8.45241	7.16328	429.797	0.0397348	25.1669	0.419448
0.936968	0.472441	0.140187		55	30	15		0	#DIV/0!		#DIV/0!	#DIV/0!		7.06677	1.7287	7.06677	1.7287	8.79547	133.695	2.22826		8.17658		9.60342	8.17658	449.712	0.0377927	26.4601	0.441002
0.851789	0.472441	0.186916		50	30	20		0	#DIV/0!		#DIV/0!	#DIV/0!		7.06677	4.52422	7.06677	4.52422	11.591	143.381	2.38968		11.0848		12.693	11.0848	554.238	0.0408899	24.4559	0.407599
0.76661	0.472441	0.233645		45	30	25		0	#DIV/0!		#DIV/0!	#DIV/0!		7.06677	8.71757	7.06677	8.71757	15.7843	153.542	2.55904		15.5012		17.3591	15.5012	697.555	0.0448625	22.2903	0.371506
0.681431	0.472441	0.280374		40	30	30		0	#DIV/0!		#DIV/0!	#DIV/0!		7.06677	12.8884	7.06677	12.8884	19.9552	166.729	2.77882		19.4538		21.6767	19.4538	778.153	0.0439076	22.7751	0.379585
0.596252	0.472441	0.327103		35	30	35		0	#DIV/0!		#DIV/0!	#DIV/0!		7.06677	15.2364	7.06677	15.2364	22.3032	186.889	3.11482		21.3458		24.1514	24.1514	845.299	0.0413568	24.1798	0.402997
0.511073	0.472441	0.373832		30	30	40		0	#DIV/0!		#DIV/0!	#DIV/0!		7.06677	15.0097	7.06677	15.0097	22.0765	218.442	3.64071		21.0186		24.8938	24.8938	746.813	0.0317555	31.4906	0.524844
0.425894	0.472441	0.420561		25	30	45		0	#DIV/0!		#DIV/0!	#DIV/0!		7.06677	12.8408	7.06677	12.8408	19.9075	266.872	4.44787		19.2408		25.664	25.664	641.6	0.023175	43.1499	0.719165
0.340716	0.472441	0.46729		20	30	50		0	#DIV/0!		#DIV/0!	#DIV/0!		7.06677	9.94185	7.06677	9.94185	17.0086	341.855	5.69759		16.8965		34.5318	34.5318	690.636	0.0197659	50.5922	0.843203
0.255537	0.472441	0.514019		15	30	55		0	#DIV/0!		#DIV/0!	#DIV/0!		7.06677	7.25982	7.06677	7.25982	14.3266	466.5	7.775		14.5908		44.7207	44.7207	670.811	0.0144527	69.1912	1.15319
0.170358	0.472441	0.560748		10	30	60		0	#DIV/0!		#DIV/0!	#DIV/0!		7.06677	5.21066	7.06677	5.21066	12.2774	712.521	11.8753		12.6165		21.4278	21.4278	214.278	0.00392847	254.552	4.24253
0.0851789	0.472441	0.607477		5	30	65		0	#DIV/0!		#DIV/0!	#DIV/0!		7.06677	3.83084	7.06677	3.83084	10.8976	1442.77	24.0462		11.0548		12.3067	12.3067	61.5334	0.00100958	990.507	16.5085
0.936968	0.629921	0.046729		55	40	5		0	#DIV/0!		#DIV/0!	#DIV/0!		5.15742	0.0853988	5.15742	0.0853988	5.24282	138.209	2.30348		5.82036		7.2472	5.82036	320.12	0.0288832	34.6222	0.577036
0.851789	0.629921	0.0934579		50	40	10		0	#DIV/0!		#DIV/0!	#DIV/0!		5.15742	0.466657	5.15742	0.466657	5.62408	151.481	2.52468		5.97375		7.58195	5.97375	298.688	0.024918	40.1317	0.668861
0.76661	0.629921	0.140187		45	40	15		0	#DIV/0!		#DIV/0!	#DIV/0!		5.15742	1.7287	5.15742	1.7287	6.88612	166.324	2.77207		6.99816		8.856	6.99816	314.917	0.0233391	42.8466	0.714109
0.681431	0.629921	0.186916		40	40	20		0	#DIV/0!		#DIV/0!	#DIV/0!		5.15742	4.52422	5.15742	4.52422	9.68164	182.346	3.0391		9.93823		12.1611	9.93823	397.529	0.0248765	40.1986	0.669977
0.596252	0.629921	0.233645		35	40	25		0	#DIV/0!		#DIV/0!	#DIV/0!		5.15742	8.71757	5.15742	8.71757	13.875	200.721	3.34536		14.4031		17.2088	17.2088	602.307	0.0307259	32.5458	0.54243
0.511073	0.629921	0.280374		30	40	30		0	#DIV/0!		#DIV/0!	#DIV/0!		5.15742	12.8884	5.15742	12.8884	18.0458	225.901	3.76502		18.3991		22.2742	22.2742	668.226	0.0288085	34.712	0.578533
0.425894	0.629921	0.327103		25	40	35		0	#DIV/0!		#DIV/0!	#DIV/0!		5.15742	15.2364	5.15742	15.2364	20.3939	265.794	4.4299		20.3117		26.7349	26.7349	668.373	0.0240117	41.6464	0.694107
0.340716	0.629921	0.373832		20	40	40		0	#DIV/0!		#DIV/0!	#DIV/0!		5.15742	15.0097	5.15742	15.0097	20.1671	332.87	5.54783		19.981		37.6163	37.6163	752.326	0.0213081	46.9304	0.782173
0.255537	0.629921	0.420561		15	40	45		0	#DIV/0!		#DIV/0!	#DIV/0!		5.15742	12.8408	5.15742	12.8408	17.9982	451.984	7.53307		18.1837		48.3136	48.3136	724.704	0.0154632	64.6696	1.07783
0.170358	0.629921	0.46729		10	40	50		0	#DIV/0!		#DIV/0!	#DIV/0!		5.15742	9.94185	5.15742	9.94185	15.0993	695.052	11.5842		15.8137		24.625	24.625	246.25	0.00432813	231.047	3.85078
0.0851789	0.629921	0.514019		5	40	55		0	#DIV/0!		#DIV/0!	#DIV/0!		5.15742	7.25982	5.15742	7.25982	12.4172	1423.27	23.7212		13.4827		14.7346	14.7346	73.6729	0.00108546	921.272	15.3545
0.76661	0.787402	0.046729		45	50	5		0	#DIV/0!		#DIV/0!	#DIV/0!		3.04527	0.0853988	3.04527	0.0853988	3.13067	172.381	2.87302		3.47888		5.33671	3.47888	156.549	0.0144309	69.2957	1.15493
0.681431	0.787402	0.0934579		40	50	10		0	#DIV/0!		#DIV/0!	#DIV/0!		3.04527	0.466657	3.04527	0.466657	3.51193	193.214	3.22024		3.63554		5.85844	3.63554	145.422	0.0122711	81.4924	1.35821
0.596252	0.787402	0.140187		35	50	15		0	#DIV/0!		#DIV/0!	#DIV/0!		3.04527	1.7287	3.04527	1.7287	4.77397	218.157	3.63594		4.68179		7.48743	7.48743	262.06	0.0158401	63.1308	1.05218
0.511073	0.787402	0.186916		30	50	20		0	#DIV/0!		#DIV/0!	#DIV/0!		3.04527	4.52422	3.04527	4.52422	7.56949	247.902	4.1317		7.68454		11.5597	11.5597	346.791	0.0167547	59.6849	0.994749
0.425894	0.787402	0.233645		25	50	25		0	#DIV/0!		#DIV/0!	#DIV/0!		3.04527	8.71757	3.04527	8.71757	11.7628	286.321	4.77201		12.2446		18.6678	18.6678	466.696	0.0177092	56.4677	0.941128
0.340716	0.787402	0.280374		20	50	30		0	#DIV/0!		#DIV/0!	#DIV/0!		3.04527	12.8884	3.04527	12.8884	15.9337	345.025	5.75041		16.3258		33.961	33.961	679.221	0.0194805	51.3333	0.855556
0.255537	0.787402	0.327103		15	50	35		0	#DIV/0!		#DIV/0!	#DIV/0!		3.04527	15.2364	3.04527	15.2364	18.2817	450.901	7.51502		18.2792		48.4091	48.4091	726.137	0.0154901	64.5575	1.07596
0.170358	0.787402	0.373832		10	50	40		0	#DIV/0!		#DIV/0!	#DIV/0!		3.04527	15.0097	3.04527	15.0097	18.055	677.65	11.2942		17.9414		26.7527	26.7527	267.527	0.00459409	217.671	3.62785
0.0851789	0.787402	0.420561		5	50	45		0	#DIV/0!		#DIV/0!	#DIV/0!		3.04527	12.8408	3.04527	12.8408	15.886	1380.67	23.0111		16.1058		17.3577	17.3577	86.7885	0.00116743	856.584	14.2764
0.596252	0.944882	0.046729		35	60	5		0	#DIV/0!		#DIV/0!	#DIV/0!		1.92907	0.0853988	1.92907	0.0853988	2.01447	224.058	3.7343		1.7928		4.59844	4.59844	160.946	0.0114164	87.5935	1.45989
0.511073	0.944882	0.0934579		30	60	10		0	#DIV/0!		#DIV/0!	#DIV/0!		1.92907	0.466657	1.92907	0.466657	2.39573	260.428	4.34046		1.95182		5.82697	5.82697	174.809	0.0103053	97.0371	1.61728
0.425894	0.944882	0.140187		25	60	15		0	#DIV/0!		#DIV/0!	#DIV/0!		1.92907	1.7287	1.92907	1.7287	3.65777	308.708	5.14514		3.0138		9.43699	9.43699	235.925	0.0104976	95.2594	1.58766
0.340716	0.944882	0.186916		20	60	20		0	#DIV/0!		#DIV/0!	#DIV/0!		1.92907	4.52422	1.92907	4.52422	6.45329	375.752	6.26253		6.06169		23.697	23.697	473.939	0.0143485	69.6938	1.16156
0.255537	0.944882	0.233645		15	60	25		0	#DIV/0!		#DIV/0!	#DIV/0!		1.92907	8.71757	1.92907	8.71757	10.6466	482.015	8.03358		10.6903		40.8202	40.8202	612.303	0.0133557	74.8745	1.24791
0.170358	0.944882	0.280374		10	60	30		0	#DIV/0!		#DIV/0!	#DIV/0!		1.92907	12.8884	1.92907	12.8884	14.8175	696.758	11.6126		14.8328		23.6441	23.6441	236.441	0.00420551	237.783	3.96305
0.0851789	0.944882	0.327103		5	60	35		0	#DIV/0!		#DIV/0!	#DIV/0!		1.92907	15.2364	1.92907	15.2364	17.1655	1365.59	22.7598		16.8156		18.0675	18.0675	90.3374	0.00118961	840.612	14.0102
0.425894	1.10236	0.046729		25	70	5		0	#DIV/0!		#DIV/0!	#DIV/0!		1.32483	0.0853988	1.32483	0.0853988	1.41023	315.55	5.25917		0.865457		7.28865	7.28865	182.216	0.00881925	113.388	1.8898
0.340716	1.10236	0.0934579		20	70	10		0	#DIV/0!		#DIV/0!	#DIV/0!		1.32483	0.466657	1.32483	0.466657	1.79149	392.96	6.54934		1.02577		18.661	18.661	373.221	0.0118305	84.5271	1.40879
0.255537	1.10236	0.140187		15	70	15		0	#DIV/0!		#DIV/0!	#DIV/0!		1.32483	1.7287	1.32483	1.7287	3.05354	517.53	8.62551		2.0964		32.2263	32.2263	483.394	0.0109386	91.419	1.52365
0.170358	1.10236	0.186916		10	70	20		0	#DIV/0!		#DIV/0!	#DIV/0!		1.32483	4.52422	1.32483	4.52422	5.84906	755.793	12.5966		5.16911		13.9804	13.9804	139.804	0.00299755	333.606	5.56009
0.0851789	1.10236	0.233645		5	70	25		0	#DIV/0!		#DIV/0!	#DIV/0!		1.32483	8.71757	1.32483	8.71757	10.0424	1453.98	24.2331		9.83546		11.0873	11.0873	55.4366	0.000971479	1029.36	17.156
0.255537	1.25984	0.046729		15	80	5		0	#DIV/0!		#DIV/0!	#DIV/0!		0.967255	0.0853988	0.967255	0.0853988	1.05265	527.778	8.79629		0.407334		30.5372	30.5372	458.058	0.0104636	95.5694	1.59282
0.170358	1.25984	0.0934579		10	80	10		0	#DIV/0!		#DIV/0!	#DIV/0!		0.967255	0.466657	0.967255	0.466657	1.43391	788.691	13.1448		0.568288		9.37959	9.37959	93.7959	0.00242245	412.806	6.88009
0.0851789	1.25984	0.140187		5	80	15		0	#DIV/0!		#DIV/0!	#DIV/0!		0.967255	1.7287	0.967255	1.7287	2.69596	1558	25.9666		1.64319		2.89505	2.89505	14.4752	0.00071547	1397.68	23.2947
1	1	1		25.6108	27.7051	46.6841		0	#DIV/0!		#DIV/0!	#DIV/0!		6.74156	11.8881	6.74156	11.8881	18.6296	263.314	4.38856		18.2424		24.1834	24.1834	619.357	0.0230292	43.4232	0.72372

## Sheet: Sheet9
mole ratio				Wt% ratio															simulated linear				real syn	real correction	real correction2	real syn	real cat reponse	time	time (min)		simulated particle size
Ni	Cu	Ag		Ni%	%Cu	%Ag	time (sec)	time(min)	catlytic activity response	linear catalytioc activity response per unit nickel	%syn	%Syn/Ni		simulated Syn of Cu	simulated syn of Ag	corrected simulated cu	corrected simulated Ag	linear addition syn(Cu,Ag)	time(sec)	time(min)		simulated function 3 dimensional
1	0	0		100	0	0	149	2.48333	0.00671141	6.71141e-05	1.29237e-14	1.29237e-16		#DIV/0!	0.0101661	0	0	0	149	2.48333		0.00177524	0	0.794544	0.00177524	0.177524	0.00672332	148.736	2.47893
1	1	1		25.6108	27.7051	46.6841	240	4	0.00416667		142.411	5.56056		6.74156	11.8881	6.74156	11.8881	18.6296	490.422	8.17369		18.2424	28.2388	24.1834	24.1834	619.357	0.0123647	80.8757	1.34793
2	1	0		64.8977	35.1023	0	150	2.5	0.00666667		53.0613	0.817615		6.45949	0.0101661	6.45949	0	6.45949	215.661	3.59436		6.75292	6.46852	7.93586	6.75292	438.249	0.0234437	42.6553	0.710922
2	0	1		52.3173	0	47.6827	140	2.33333	0.00714286		103.429	1.97696		#DIV/0!	11.3036	0	11.3036	11.3036	255.877	4.26462		11.7134	11.2934	13.2309	11.7134	612.814	0.0250285	39.9544	0.665907
1	1	0		48.036	51.964	0	452	7.53333	0.00221239		-31.3752	-0.653161		2.76453	0.0101661	2.76453	0	2.76453	301.84	5.03066		3.07186	2.76975	4.76806	3.07186	147.56	0.00798106	125.297	2.08828
1	0	1		35.4255	0	64.5745	598	9.96667	0.00167224		-29.6653	-0.837401		#DIV/0!	3.92474	0	3.92474	3.92474	404.717	6.74529		4.43788	3.91963	7.18082	7.18082	254.384	0.00842565	118.685	1.97809
1	2	0		31.6101	68.3899	0	1100	18.3333	0.000909091		-57.1484	-1.80791		1.40096	0.0101661	1.40096	0	1.40096	464.856	7.74759		0.96801	1.44014	4.41342	4.41342	139.509	0.00508114	196.806	3.2801					oNP
1	0	2		21.5255	0	78.4745	1500	25	0.000666667		-53.8532	-2.50183		#DIV/0!	2.59941	0	2.59941	2.59941	674.665	11.2444		1.67135	2.63471	13.4553	13.4553	289.632	0.00562887	177.656	2.96093
1	0.1	0		90.2383	9.76172	0	355	5.91667	0.0028169		-53.4878	-0.592739		0.64015	0.0101661	0.64015	0	0.64015	164.068	2.73447		0.445501	0.642236	1.30909	0.445501	40.2012	0.00849095	117.772	1.96287
1	0	0.1		84.5821	0	15.4179	230	3.83333	0.00434783		-23.4086	-0.276756		#DIV/0!	1.89745	0	1.89745	1.89745	172.88	2.88133		1.42144	1.89286	2.33537	1.42144	120.228	0.0125016	79.9898	1.33316
1	1	2		17.4598	18.8876	63.6526	327	5.45	0.0030581		160.975	9.2197		3.11049	4.14239	3.11049	4.14239	7.25288	795.677	13.2613		8.14204	45.0326	45.0016	45.0016	785.721	0.0103789	96.3494	1.60582
1	2	1		20.0547	43.3891	36.5562	322	5.36667	0.00310559		130.736	6.51897		4.30594	15.435	4.30594	15.435	19.7409	620.481	10.3413		19.7217	34.0855	37.0723	37.0723	743.472	0.0113527	88.0847	1.46808
2	1	1		40.778	22.0563	37.1657	136	2.26667	0.00735294		168.671	4.13632		4.52761	15.4431	4.52761	15.4431	19.9707	304.568	5.07614		19.7081	19.9225	21.8636	19.7081	803.66	0.0247312	40.4348	0.673913
1	0.0198	0.029		93.0855	1.99381	4.92069	400	6.66667	0.0025		-59.983	-0.644386		0.0238102	0.0828505	0.0238102	0.0828505	0.106661	159.897	2.66496		0.0153193	28.2388	0.856389	0.0153193	1.42601	0.00633644	157.817	2.63029
1	0.029	0.314		62.3543	1.95614	35.6896		0	#DIV/0!		#DIV/0!	#DIV/0!		0.0229146	15.3564	0.0229146	15.3564	15.3793	207.106	3.45176		15.3527	10.4704	16.5879	15.3527	957.308	0.0442467	22.6005	0.376676
3	1	1		50.8078	18.3208	30.8713		0	#DIV/0!		#DIV/0!	#DIV/0!		2.88175	13.4694	2.88175	13.4694	16.3512	252.049	4.20081		16.6981		18.2732	16.6981	848.395	0.0323395	30.9219	0.515365
1	2	3		11.5848	25.0641	63.3511		0	#DIV/0!		#DIV/0!	#DIV/0!		5.87669	4.2179	5.87669	4.2179	10.0946	1168.24	19.4707		10.6674		24.9792	24.9792	289.379	0.00302742	330.314	5.50523
4	2	1		50.0853	27.0904	22.8242		0	#DIV/0!		#DIV/0!	#DIV/0!		6.58235	6.78632	6.58235	6.78632	13.3687	262.411	4.37352		13.1491		14.7537	13.1491	658.578	0.0254991	39.2171	0.653619
1	4	1		13.9862	60.5194	25.4944		0	#DIV/0!		#DIV/0!	#DIV/0!		1.88833	9.1626	1.88833	9.1626	11.0509	959.323	15.9887		11.0997		35.5587	35.5587	497.33	0.00560695	178.35	2.9725
1	1	4		10.6688	11.5413	77.7899		0	#DIV/0!		#DIV/0!	#DIV/0!		0.936176	2.58803	0.936176	2.58803	3.5242	1349.05	22.4841		2.53419		13.4909	13.4909	143.933	0.00174663	572.531	9.54218
2	3	1		28.296	45.9147	25.7893		0	#DIV/0!		#DIV/0!	#DIV/0!		3.76131	9.42736	3.76131	9.42736	13.1887	465.22	7.75367		13.8232		18.2971	18.2971	517.733	0.0117311	85.2434	1.42072
3	1	1		50.8078	18.3208	30.8713		0	#DIV/0!		#DIV/0!	#DIV/0!		2.88175	13.4694	2.88175	13.4694	16.3512	252.049	4.20081		16.6981		18.2732	16.6981	848.395	0.0323395	30.9219	0.515365
1	4	5		6.92462	29.9634	63.1119		0	#DIV/0!		#DIV/0!	#DIV/0!		7.06498	4.27934	7.06498	4.27934	11.3443	1932.51	32.2085		11.5943		14.3946	14.3946	99.6771	0.000927978	1077.61	17.9602
2	1	1		40.778	22.0563	37.1657		0	#DIV/0!		#DIV/0!	#DIV/0!		4.52761	15.4431	4.52761	15.4431	19.9707	304.568	5.07614		19.7081		21.8636	19.7081	803.66	0.0247312	40.4348	0.673913
3	2	1		42.9407	30.9681	26.0912		0	#DIV/0!		#DIV/0!	#DIV/0!		7.07577	9.6972	7.07577	9.6972	16.773	297.149	4.95248		16.5093		18.4995	16.5093	708.923	0.0233126	42.8953	0.714922
1	2	6		7.09194	15.3437	77.5643		0	#DIV/0!		#DIV/0!	#DIV/0!		1.84956	2.58611	1.84956	2.58611	4.43567	2011.74	33.529		3.75747		6.75013	6.75013	47.8715	0.000703823	1420.81	23.6802
1.44804	0.15748	0.046729		85	10	5		0	#DIV/0!		#DIV/0!	#DIV/0!		0.675626	0.0853988	0.675626	0.0853988	0.761025	173.97	2.8995		0.49154		1.40147	0.49154	41.7809	0.00808817	123.637	2.06062
0.851789	0.314961	0.280374		50	20	30		0	#DIV/0!		#DIV/0!	#DIV/0!		3.58556	12.8884	3.58556	12.8884	16.474	255.851	4.26419		16.8723		18.4805	16.8723	843.616	0.031665	31.5806	0.526344
0.681431	0.629921	0.186916		40	40	20		0	#DIV/0!		#DIV/0!	#DIV/0!		5.15742	4.52422	5.15742	4.52422	9.68164	339.619	5.66032		9.93823		12.1611	9.93823	397.529	0.0133565	74.87	1.24783
0.936968	0.0787402	0.373832		55	5	40		0	#DIV/0!		#DIV/0!	#DIV/0!		0.15384	15.0097	0.15384	15.0097	15.1635	235.239	3.92064		14.9646		16.3915	14.9646	823.056	0.0340725	29.3492	0.489153
1.10733	0.23622	0.186916		65	15	20		0	#DIV/0!		#DIV/0!	#DIV/0!		1.74912	4.52422	1.74912	4.52422	6.27335	215.699	3.59499		6.14329		7.32425	6.14329	399.314	0.0217822	45.9091	0.765152
0.76661	0.629921	0.140187		45	40	15		0	#DIV/0!		#DIV/0!	#DIV/0!		5.15742	1.7287	5.15742	1.7287	6.88612	309.779	5.16299		6.99816		8.856	6.99816	314.917	0.0125311	79.8017	1.33003
0.255537	1.25984	0.046729		15	80	5		0	#DIV/0!		#DIV/0!	#DIV/0!		0.967255	0.0853988	0.967255	0.0853988	1.05265	982.986	16.3831		0.407334		30.5372	30.5372	458.058	0.00561804	177.998	2.96663
1.1925	0.314961	0.0934579		70	20	10		0	#DIV/0!		#DIV/0!	#DIV/0!		3.58556	0.466657	3.58556	0.466657	4.05222	204.568	3.40946		4.25195		5.34564	4.25195	297.637	0.0186809	53.5305	0.892176
0.170358	1.10236	0.186916		10	70	20		0	#DIV/0!		#DIV/0!	#DIV/0!		1.32483	4.52422	1.32483	4.52422	5.84906	1407.66	23.4611		5.16911		13.9804	13.9804	139.804	0.00160942	621.34	10.3557
1.60136	0.015748	0.046729		94	1	5		0	#DIV/0!		#DIV/0!	#DIV/0!		0.00596659	0.0853988	0.00596659	0.0853988	0.0913654	158.366	2.63943		0.0115097		0.845699	0.0115097	1.08191	0.00637698	156.814	2.61357
1.46508	0.15748	0.0373832		86	10	4		0	#DIV/0!		#DIV/0!	#DIV/0!		0.675626	0.0578237	0.675626	0.0578237	0.73345	171.994	2.86657		0.487372		1.38791	0.487372	41.914	0.00819101	122.085	2.03475
0.596252	0.944882	0.046729		35	60	5		0	#DIV/0!		#DIV/0!	#DIV/0!		1.92907	0.0853988	1.92907	0.0853988	2.01447	417.308	6.95513		1.7928		4.59844	4.59844	160.946	0.00612959	163.143	2.71905
1.02215	0.472441	0.0934579		60	30	10		0	#DIV/0!		#DIV/0!	#DIV/0!		7.06677	0.466657	7.06677	0.466657	7.53343	230.936	3.84893		7.16328		8.45241	7.16328	429.797	0.0213341	46.8733	0.781222
0.511073	0.787402	0.186916		30	50	20		0	#DIV/0!		#DIV/0!	#DIV/0!		3.04527	4.52422	3.04527	4.52422	7.56949	461.717	7.69528		7.68454		11.5597	11.5597	346.791	0.00899579	111.163	1.85272
1.53322	0.0787402	0.046729		90	5	5		0	#DIV/0!		#DIV/0!	#DIV/0!		0.15384	0.0853988	0.15384	0.0853988	0.239239	165.16	2.75267		0.061433		0.926984	0.061433	5.52897	0.00637423	156.882	2.61469
1.1925	0.267717	0.121495		70	17	13		0	#DIV/0!		#DIV/0!	#DIV/0!		2.38782	1.0699	2.38782	1.0699	3.45772	205.743	3.42905		3.31479		4.40848	3.31479	232.036	0.015599	64.1067	1.06845
0.477002	0.188976	0.560748		28	12	60		0	#DIV/0!		#DIV/0!	#DIV/0!		1.02485	5.21066	1.02485	5.21066	6.2355	500.909	8.34848		6.83072		11.4289	11.4289	320.01	0.00789281	126.698	2.11163
0.76661	0.23622	0.373832		45	15	40		0	#DIV/0!		#DIV/0!	#DIV/0!		1.74912	15.0097	1.74912	15.0097	16.7588	283.586	4.72643		16.5466		18.4045	16.5466	744.598	0.025508	39.2034	0.65339
0.681431	0.787402	0.0934579		40	50	10		0	#DIV/0!		#DIV/0!	#DIV/0!		3.04527	0.466657	3.04527	0.466657	3.51193	359.862	5.9977		3.63554		5.85844	3.63554	145.422	0.0065885	151.78	2.52966
0.76661	0.629921	0.140187		45	40	15		0	#DIV/0!		#DIV/0!	#DIV/0!		5.15742	1.7287	5.15742	1.7287	6.88612	309.779	5.16299		6.99816		8.856	6.99816	314.917	0.0125311	79.8017	1.33003
0.851789	0.472441	0.186916		50	30	20		0	#DIV/0!		#DIV/0!	#DIV/0!		7.06677	4.52422	7.06677	4.52422	11.591	267.047	4.45078		11.0848		12.693	11.0848	554.238	0.0219543	45.5492	0.759153
0.851789	0.393701	0.233645		50	25	25		0	#DIV/0!		#DIV/0!	#DIV/0!		5.85063	8.71757	5.85063	8.71757	14.5682	260.107	4.33512		14.6587		16.2669	14.6587	732.937	0.0279509	35.777	0.596284
0.936968	0.23622	0.280374		55	15	30		0	#DIV/0!		#DIV/0!	#DIV/0!		1.74912	12.8884	1.74912	12.8884	14.6375	236.318	3.93863		14.9079		16.3347	14.9079	819.933	0.0339573	29.4488	0.490813
0.851789	0.15748	0.373832		50	10	40		0	#DIV/0!		#DIV/0!	#DIV/0!		0.675626	15.0097	0.675626	15.0097	15.6853	257.595	4.29326		15.3393		16.9475	15.3393	766.965	0.0290928	34.3728	0.57288
1.44804	0.0787402	0.0934579		85	5	10		0	#DIV/0!		#DIV/0!	#DIV/0!		0.15384	0.466657	0.15384	0.466657	0.620497	174.213	2.90355		0.22287		1.13279	0.22287	18.9439	0.00678539	147.375	2.45626
1.36286	0.0787402	0.140187		80	5	15		0	#DIV/0!		#DIV/0!	#DIV/0!		0.15384	1.7287	0.15384	1.7287	1.88254	182.809	3.04681		1.301		2.26236	1.301	104.08	0.0109573	91.2633	1.52106
1.27768	0.0787402	0.186916		75	5	20		0	#DIV/0!		#DIV/0!	#DIV/0!		0.15384	4.52422	0.15384	4.52422	4.67806	189.788	3.16314		4.39524		5.41697	4.39524	329.643	0.0216263	46.24	0.770666
1.1925	0.0787402	0.233645		70	5	25		0	#DIV/0!		#DIV/0!	#DIV/0!		0.15384	8.71757	0.15384	8.71757	8.87141	195.512	3.25854		9.09427		10.188	9.09427	636.599	0.0346053	28.8973	0.481622
1.10733	0.0787402	0.280374		65	5	30	150	2.5	0.00666667		52.8205	0.812623		0.15384	12.8884	0.15384	12.8884	13.0423	202.783	3.37972		13.2997		14.4807	13.2997	864.482	0.0420747	23.7672	0.396121
1.02215	0.0787402	0.327103		60	5	35		0	#DIV/0!		#DIV/0!	#DIV/0!		0.15384	15.2364	0.15384	15.2364	15.3903	215.212	3.58686		15.3127		16.6018	15.3127	918.763	0.041024	24.376	0.406266
0.936968	0.0787402	0.373832		55	5	40		0	#DIV/0!		#DIV/0!	#DIV/0!		0.15384	15.0097	0.15384	15.0097	15.1635	235.239	3.92064		14.9646		16.3915	14.9646	823.056	0.0340725	29.3492	0.489153
0.851789	0.0787402	0.420561		50	5	45		0	#DIV/0!		#DIV/0!	#DIV/0!		0.15384	12.8408	0.15384	12.8408	12.9946	263.729	4.39549		13.0731		14.6813	13.0731	653.656	0.0252905	39.5406	0.65901
0.76661	0.0787402	0.46729		45	5	50		0	#DIV/0!		#DIV/0!	#DIV/0!		0.15384	9.94185	0.15384	9.94185	10.0957	300.748	5.01247		10.5788		12.4367	10.5788	476.047	0.0173974	57.4799	0.957999
0.681431	0.0787402	0.514019		40	5	55		0	#DIV/0!		#DIV/0!	#DIV/0!		0.15384	7.25982	0.15384	7.25982	7.41366	346.79	5.77984		8.1256		10.3485	8.1256	325.024	0.01141	87.6421	1.4607
0.596252	0.0787402	0.560748		35	5	60		0	#DIV/0!		#DIV/0!	#DIV/0!		0.15384	5.21066	0.15384	5.21066	5.3645	404.04	6.73399		6.02497		8.83061	8.83061	309.072	0.00960906	104.068	1.73447
0.511073	0.0787402	0.607477		30	5	65		0	#DIV/0!		#DIV/0!	#DIV/0!		0.15384	3.83084	0.15384	3.83084	3.98468	477.634	7.96057		4.36339		8.23854	8.23854	247.156	0.00698972	143.067	2.38445
0.425894	0.0787402	0.654206		25	5	70		0	#DIV/0!		#DIV/0!	#DIV/0!		0.15384	3.00645	0.15384	3.00645	3.16029	577.742	9.62903		3.11211		9.5353	9.5353	238.382	0.00567756	176.132	2.93553
0.340716	0.0787402	0.700935		20	5	75		0	#DIV/0!		#DIV/0!	#DIV/0!		0.15384	2.62483	0.15384	2.62483	2.77867	724.859	12.081		2.19922		19.8345	19.8345	396.69	0.00666698	149.993	2.49988
0.255537	0.0787402	0.747664		15	5	80		0	#DIV/0!		#DIV/0!	#DIV/0!		0.15384	2.65681	0.15384	2.65681	2.81065	966.178	16.103		1.54698		31.6769	31.6769	475.153	0.00579013	172.708	2.87846
0.170358	0.0787402	0.794393		10	5	85		0	#DIV/0!		#DIV/0!	#DIV/0!		0.15384	3.24904	0.15384	3.24904	3.40288	1440.97	24.0161		1.08743		9.89872	9.89872	98.9872	0.00133548	748.792	12.4799
0.0851789	0.0787402	0.841121		5	5	90		0	#DIV/0!		#DIV/0!	#DIV/0!		0.15384	5.00282	0.15384	5.00282	5.15666	2833.87	47.2311		0.766666		2.01852	2.01852	10.0926	0.000369438	2706.81	45.1135
1.44804	0.15748	0.046729		85	10	5		0	#DIV/0!		#DIV/0!	#DIV/0!		0.675626	0.0853988	0.675626	0.0853988	0.761025	173.97	2.8995		0.49154		1.40147	0.49154	41.7809	0.00808817	123.637	2.06062
1.36286	0.15748	0.0934579		80	10	10		0	#DIV/0!		#DIV/0!	#DIV/0!		0.675626	0.466657	0.675626	0.466657	1.14228	184.147	3.06911		0.652377		1.61374	0.652377	52.1901	0.00817128	122.38	2.03966
1.27768	0.15748	0.140187		75	10	15		0	#DIV/0!		#DIV/0!	#DIV/0!		0.675626	1.7287	0.675626	1.7287	2.40433	194.002	3.23337		1.72649		2.74823	1.72649	129.487	0.0115514	86.5699	1.44283
1.1925	0.15748	0.186916		70	10	20		0	#DIV/0!		#DIV/0!	#DIV/0!		0.675626	4.52422	0.675626	4.52422	5.19985	202.336	3.37227		4.80922		5.9029	4.80922	336.645	0.0205135	48.7483	0.812472
1.10733	0.15748	0.233645		65	10	25		0	#DIV/0!		#DIV/0!	#DIV/0!		0.675626	8.71757	0.675626	8.71757	9.39319	209.548	3.49246		9.49076		10.6717	9.49076	616.9	0.0312741	31.9753	0.532922
1.02215	0.15748	0.280374		60	10	30		0	#DIV/0!		#DIV/0!	#DIV/0!		0.675626	12.8884	0.675626	12.8884	13.564	218.672	3.64454		13.6806		14.9697	13.6806	820.834	0.0370806	26.9683	0.449472
0.936968	0.15748	0.327103		55	10	35		0	#DIV/0!		#DIV/0!	#DIV/0!		0.675626	15.2364	0.675626	15.2364	15.9121	233.719	3.89532		15.6861		17.1129	15.6861	862.734	0.0355371	28.1396	0.468993
0.851789	0.15748	0.373832		50	10	40		0	#DIV/0!		#DIV/0!	#DIV/0!		0.675626	15.0097	0.675626	15.0097	15.6853	257.595	4.29326		15.3393		16.9475	15.3393	766.965	0.0290928	34.3728	0.57288
0.76661	0.15748	0.420561		45	10	45		0	#DIV/0!		#DIV/0!	#DIV/0!		0.675626	12.8408	0.675626	12.8408	13.5164	291.686	4.86143		13.4548		15.3126	13.4548	605.466	0.021306	46.9351	0.782251
0.681431	0.15748	0.46729		40	10	50		0	#DIV/0!		#DIV/0!	#DIV/0!		0.675626	9.94185	0.675626	9.94185	10.6175	336.746	5.61243		10.9698		13.1927	10.9698	438.791	0.0144642	69.1362	1.15227
0.596252	0.15748	0.514019		35	10	55		0	#DIV/0!		#DIV/0!	#DIV/0!		0.675626	7.25982	0.675626	7.25982	7.93544	394.416	6.57359		8.5257		11.3313	11.3313	396.597	0.011665	85.7263	1.42877
0.511073	0.15748	0.560748		30	10	60		0	#DIV/0!		#DIV/0!	#DIV/0!		0.675626	5.21066	0.675626	5.21066	5.88628	469.057	7.81761		6.43289		10.308	10.308	309.241	0.00823975	121.363	2.02271
0.425894	0.15748	0.607477		25	10	65		0	#DIV/0!		#DIV/0!	#DIV/0!		0.675626	3.83084	0.675626	3.83084	4.50646	570.3	9.50499		4.77749		11.2007	11.2007	280.017	0.00637612	156.835	2.61392
0.340716	0.15748	0.654206		20	10	70		0	#DIV/0!		#DIV/0!	#DIV/0!		0.675626	3.00645	0.675626	3.00645	3.68208	718.543	11.9757		3.53087		21.1661	21.1661	423.323	0.00702447	142.36	2.37266
0.255537	0.15748	0.700935		15	10	75		0	#DIV/0!		#DIV/0!	#DIV/0!		0.675626	2.62483	0.675626	2.62483	3.30046	961.596	16.0266		2.62137		32.7513	32.7513	491.269	0.00595237	168	2.8
0.170358	0.15748	0.747664		10	10	80		0	#DIV/0!		#DIV/0!	#DIV/0!		0.675626	2.65681	0.675626	2.65681	3.33243	1441.95	24.0325		1.97156		10.7829	10.7829	107.829	0.00139482	716.937	11.949
0.0851789	0.15748	0.794393		5	10	85		0	#DIV/0!		#DIV/0!	#DIV/0!		0.675626	3.24904	0.675626	3.24904	3.92467	2867.46	47.791		1.51372		2.76557	2.76557	13.8279	0.000381973	2617.99	43.6331
1.27768	0.314961	0.046729		75	20	5		0	#DIV/0!		#DIV/0!	#DIV/0!		3.58556	0.0853988	3.58556	0.0853988	3.67096	191.632	3.19387		4.09615		5.11789	4.09615	307.211	0.0204972	48.7871	0.813118
1.1925	0.314961	0.0934579		70	20	10		0	#DIV/0!		#DIV/0!	#DIV/0!		3.58556	0.466657	3.58556	0.466657	4.05222	204.568	3.40946		4.25195		5.34564	4.25195	297.637	0.0186809	53.5305	0.892176
1.10733	0.314961	0.140187		65	20	15		0	#DIV/0!		#DIV/0!	#DIV/0!		3.58556	1.7287	3.58556	1.7287	5.31426	217.664	3.62773		5.29245		6.4734	5.29245	344.009	0.0193695	51.6275	0.860458
1.02215	0.314961	0.186916		60	20	20		0	#DIV/0!		#DIV/0!	#DIV/0!		3.58556	4.52422	3.58556	4.52422	8.10978	229.705	3.82841		8.27867		9.5678	8.27867	496.72	0.024029	41.6164	0.693606
0.936968	0.314961	0.233645		55	20	25		0	#DIV/0!		#DIV/0!	#DIV/0!		3.58556	8.71757	3.58556	8.71757	12.3031	241.23	4.0205		12.8137		14.2405	12.8137	704.752	0.0297056	33.6637	0.561061
0.851789	0.314961	0.280374		50	20	30		0	#DIV/0!		#DIV/0!	#DIV/0!		3.58556	12.8884	3.58556	12.8884	16.474	255.851	4.26419		16.8723		18.4805	16.8723	843.616	0.031665	31.5806	0.526344
0.76661	0.314961	0.327103		45	20	35		0	#DIV/0!		#DIV/0!	#DIV/0!		3.58556	15.2364	3.58556	15.2364	18.822	278.661	4.64436		18.815		20.6729	18.815	846.677	0.0285909	34.9761	0.582936
0.681431	0.314961	0.373832		40	20	40		0	#DIV/0!		#DIV/0!	#DIV/0!		3.58556	15.0097	3.58556	15.0097	18.5953	314.094	5.23489		18.4791		20.702	18.4791	739.165	0.0225279	44.3894	0.739823
0.596252	0.314961	0.420561		35	20	45		0	#DIV/0!		#DIV/0!	#DIV/0!		3.58556	12.8408	3.58556	12.8408	16.4263	365.651	6.09419		16.6536		19.4593	19.4593	681.074	0.0183474	54.5037	0.908395
0.511073	0.314961	0.46729		30	20	50		0	#DIV/0!		#DIV/0!	#DIV/0!		3.58556	9.94185	3.58556	9.94185	13.5274	437.486	7.29144		14.2464		18.1215	18.1215	543.646	0.0129593	77.1645	1.28608
0.425894	0.314961	0.514019		25	20	55		0	#DIV/0!		#DIV/0!	#DIV/0!		3.58556	7.25982	3.58556	7.25982	10.8454	537.686	8.96143		11.8788		18.302	18.302	457.55	0.00935487	106.896	1.7816
0.340716	0.314961	0.560748		20	20	60		0	#DIV/0!		#DIV/0!	#DIV/0!		3.58556	5.21066	3.58556	5.21066	8.79622	684.766	11.4128		9.85152		27.4868	27.4868	549.736	0.00872129	114.662	1.91103
0.255537	0.314961	0.607477		15	20	65		0	#DIV/0!		#DIV/0!	#DIV/0!		3.58556	3.83084	3.58556	3.83084	7.41639	924.75	15.4125		8.24794		38.3778	38.3778	575.667	0.00680202	147.015	2.45025
0.170358	0.314961	0.654206		10	20	70		0	#DIV/0!		#DIV/0!	#DIV/0!		3.58556	3.00645	3.58556	3.00645	6.59201	1397.85	23.2976		7.04034		15.8516	15.8516	158.516	0.00173501	576.366	9.6061
0.0851789	0.314961	0.700935		5	20	75		0	#DIV/0!		#DIV/0!	#DIV/0!		3.58556	2.62483	3.58556	2.62483	6.21039	2805.75	46.7625		6.15932		7.41117	7.41117	37.0559	0.000459919	2174.3	36.2383
1.10733	0.472441	0.046729		65	30	5		0	#DIV/0!		#DIV/0!	#DIV/0!		7.06677	0.0853988	7.06677	0.0853988	7.15217	213.93	3.5655		7.01155		8.19251	7.01155	455.751	0.0242442	41.247	0.687451
1.02215	0.472441	0.0934579		60	30	10		0	#DIV/0!		#DIV/0!	#DIV/0!		7.06677	0.466657	7.06677	0.466657	7.53343	230.936	3.84893		7.16328		8.45241	7.16328	429.797	0.0213341	46.8733	0.781222
0.936968	0.472441	0.140187		55	30	15		0	#DIV/0!		#DIV/0!	#DIV/0!		7.06677	1.7287	7.06677	1.7287	8.79547	249.008	4.15013		8.17658		9.60342	8.17658	449.712	0.0202914	49.282	0.821367
0.851789	0.472441	0.186916		50	30	20		0	#DIV/0!		#DIV/0!	#DIV/0!		7.06677	4.52422	7.06677	4.52422	11.591	267.047	4.45078		11.0848		12.693	11.0848	554.238	0.0219543	45.5492	0.759153
0.76661	0.472441	0.233645		45	30	25		0	#DIV/0!		#DIV/0!	#DIV/0!		7.06677	8.71757	7.06677	8.71757	15.7843	285.972	4.7662		15.5012		17.3591	15.5012	697.555	0.0240872	41.5157	0.691929
0.681431	0.472441	0.280374		40	30	30		0	#DIV/0!		#DIV/0!	#DIV/0!		7.06677	12.8884	7.06677	12.8884	19.9552	310.533	5.17554		19.4538		21.6767	19.4538	778.153	0.0235746	42.4186	0.706977
0.596252	0.472441	0.327103		35	30	35		0	#DIV/0!		#DIV/0!	#DIV/0!		7.06677	15.2364	7.06677	15.2364	22.3032	348.081	5.80135		21.3458		24.1514	24.1514	845.299	0.022205	45.0349	0.750582
0.511073	0.472441	0.373832		30	30	40		0	#DIV/0!		#DIV/0!	#DIV/0!		7.06677	15.0097	7.06677	15.0097	22.0765	406.849	6.78081		21.0186		24.8938	24.8938	746.813	0.0170499	58.6513	0.977521
0.425894	0.472441	0.420561		25	30	45		0	#DIV/0!		#DIV/0!	#DIV/0!		7.06677	12.8408	7.06677	12.8408	19.9075	497.05	8.28416		19.2408		25.664	25.664	641.6	0.012443	80.3667	1.33945
0.340716	0.472441	0.46729		20	30	50		0	#DIV/0!		#DIV/0!	#DIV/0!		7.06677	9.94185	7.06677	9.94185	17.0086	636.705	10.6118		16.8965		34.5318	34.5318	690.636	0.0106126	94.228	1.57047
0.255537	0.472441	0.514019		15	30	55		0	#DIV/0!		#DIV/0!	#DIV/0!		7.06677	7.25982	7.06677	7.25982	14.3266	868.856	14.4809		14.5908		44.7207	44.7207	670.811	0.00775984	128.869	2.14781
0.170358	0.472441	0.560748		10	30	60		0	#DIV/0!		#DIV/0!	#DIV/0!		7.06677	5.21066	7.06677	5.21066	12.2774	1327.07	22.1178		12.6165		21.4278	21.4278	214.278	0.00210925	474.103	7.90171
0.0851789	0.472441	0.607477		5	30	65		0	#DIV/0!		#DIV/0!	#DIV/0!		7.06677	3.83084	7.06677	3.83084	10.8976	2687.16	44.7861		11.0548		12.3067	12.3067	61.5334	0.000542058	1844.82	30.747
0.936968	0.629921	0.046729		55	40	5		0	#DIV/0!		#DIV/0!	#DIV/0!		5.15742	0.0853988	5.15742	0.0853988	5.24282	257.413	4.29022		5.82036		7.2472	5.82036	320.12	0.0155078	64.4838	1.07473
1.02215	0.472441	0.0934579		60	30	10		0	#DIV/0!		#DIV/0!	#DIV/0!		7.06677	0.466657	7.06677	0.466657	7.53343	230.936	3.84893		7.16328		8.45241	7.16328	429.797	0.0213341	46.8733	0.781222
0.936968	0.472441	0.140187		55	30	15		0	#DIV/0!		#DIV/0!	#DIV/0!		7.06677	1.7287	7.06677	1.7287	8.79547	249.008	4.15013		8.17658		9.60342	8.17658	449.712	0.0202914	49.282	0.821367
0.851789	0.472441	0.186916		50	30	20		0	#DIV/0!		#DIV/0!	#DIV/0!		7.06677	4.52422	7.06677	4.52422	11.591	267.047	4.45078		11.0848		12.693	11.0848	554.238	0.0219543	45.5492	0.759153
0.76661	0.472441	0.233645		45	30	25		0	#DIV/0!		#DIV/0!	#DIV/0!		7.06677	8.71757	7.06677	8.71757	15.7843	285.972	4.7662		15.5012		17.3591	15.5012	697.555	0.0240872	41.5157	0.691929
0.681431	0.472441	0.280374		40	30	30		0	#DIV/0!		#DIV/0!	#DIV/0!		7.06677	12.8884	7.06677	12.8884	19.9552	310.533	5.17554		19.4538		21.6767	19.4538	778.153	0.0235746	42.4186	0.706977
0.596252	0.472441	0.327103		35	30	35		0	#DIV/0!		#DIV/0!	#DIV/0!		7.06677	15.2364	7.06677	15.2364	22.3032	348.081	5.80135		21.3458		24.1514	24.1514	845.299	0.022205	45.0349	0.750582
0.511073	0.472441	0.373832		30	30	40		0	#DIV/0!		#DIV/0!	#DIV/0!		7.06677	15.0097	7.06677	15.0097	22.0765	406.849	6.78081		21.0186		24.8938	24.8938	746.813	0.0170499	58.6513	0.977521
0.425894	0.472441	0.420561		25	30	45		0	#DIV/0!		#DIV/0!	#DIV/0!		7.06677	12.8408	7.06677	12.8408	19.9075	497.05	8.28416		19.2408		25.664	25.664	641.6	0.012443	80.3667	1.33945
0.340716	0.472441	0.46729		20	30	50		0	#DIV/0!		#DIV/0!	#DIV/0!		7.06677	9.94185	7.06677	9.94185	17.0086	636.705	10.6118		16.8965		34.5318	34.5318	690.636	0.0106126	94.228	1.57047
0.255537	0.472441	0.514019		15	30	55		0	#DIV/0!		#DIV/0!	#DIV/0!		7.06677	7.25982	7.06677	7.25982	14.3266	868.856	14.4809		14.5908		44.7207	44.7207	670.811	0.00775984	128.869	2.14781
0.170358	0.472441	0.560748		10	30	60		0	#DIV/0!		#DIV/0!	#DIV/0!		7.06677	5.21066	7.06677	5.21066	12.2774	1327.07	22.1178		12.6165		21.4278	21.4278	214.278	0.00210925	474.103	7.90171
0.0851789	0.472441	0.607477		5	30	65		0	#DIV/0!		#DIV/0!	#DIV/0!		7.06677	3.83084	7.06677	3.83084	10.8976	2687.16	44.7861		11.0548		12.3067	12.3067	61.5334	0.000542058	1844.82	30.747
0.936968	0.629921	0.046729		55	40	5		0	#DIV/0!		#DIV/0!	#DIV/0!		5.15742	0.0853988	5.15742	0.0853988	5.24282	257.413	4.29022		5.82036		7.2472	5.82036	320.12	0.0155078	64.4838	1.07473
1.02215	0.472441	0.0934579		60	30	10		0	#DIV/0!		#DIV/0!	#DIV/0!		7.06677	0.466657	7.06677	0.466657	7.53343	230.936	3.84893		7.16328		8.45241	7.16328	429.797	0.0213341	46.8733	0.781222
0.936968	0.472441	0.140187		55	30	15		0	#DIV/0!		#DIV/0!	#DIV/0!		7.06677	1.7287	7.06677	1.7287	8.79547	249.008	4.15013		8.17658		9.60342	8.17658	449.712	0.0202914	49.282	0.821367
0.851789	0.472441	0.186916		50	30	20		0	#DIV/0!		#DIV/0!	#DIV/0!		7.06677	4.52422	7.06677	4.52422	11.591	267.047	4.45078		11.0848		12.693	11.0848	554.238	0.0219543	45.5492	0.759153
0.76661	0.472441	0.233645		45	30	25		0	#DIV/0!		#DIV/0!	#DIV/0!		7.06677	8.71757	7.06677	8.71757	15.7843	285.972	4.7662		15.5012		17.3591	15.5012	697.555	0.0240872	41.5157	0.691929
0.681431	0.472441	0.280374		40	30	30		0	#DIV/0!		#DIV/0!	#DIV/0!		7.06677	12.8884	7.06677	12.8884	19.9552	310.533	5.17554		19.4538		21.6767	19.4538	778.153	0.0235746	42.4186	0.706977
0.596252	0.472441	0.327103		35	30	35		0	#DIV/0!		#DIV/0!	#DIV/0!		7.06677	15.2364	7.06677	15.2364	22.3032	348.081	5.80135		21.3458		24.1514	24.1514	845.299	0.022205	45.0349	0.750582
0.511073	0.472441	0.373832		30	30	40		0	#DIV/0!		#DIV/0!	#DIV/0!		7.06677	15.0097	7.06677	15.0097	22.0765	406.849	6.78081		21.0186		24.8938	24.8938	746.813	0.0170499	58.6513	0.977521
0.425894	0.472441	0.420561		25	30	45		0	#DIV/0!		#DIV/0!	#DIV/0!		7.06677	12.8408	7.06677	12.8408	19.9075	497.05	8.28416		19.2408		25.664	25.664	641.6	0.012443	80.3667	1.33945
0.340716	0.472441	0.46729		20	30	50		0	#DIV/0!		#DIV/0!	#DIV/0!		7.06677	9.94185	7.06677	9.94185	17.0086	636.705	10.6118		16.8965		34.5318	34.5318	690.636	0.0106126	94.228	1.57047
0.255537	0.472441	0.514019		15	30	55		0	#DIV/0!		#DIV/0!	#DIV/0!		7.06677	7.25982	7.06677	7.25982	14.3266	868.856	14.4809		14.5908		44.7207	44.7207	670.811	0.00775984	128.869	2.14781
0.170358	0.472441	0.560748		10	30	60		0	#DIV/0!		#DIV/0!	#DIV/0!		7.06677	5.21066	7.06677	5.21066	12.2774	1327.07	22.1178		12.6165		21.4278	21.4278	214.278	0.00210925	474.103	7.90171
0.0851789	0.472441	0.607477		5	30	65		0	#DIV/0!		#DIV/0!	#DIV/0!		7.06677	3.83084	7.06677	3.83084	10.8976	2687.16	44.7861		11.0548		12.3067	12.3067	61.5334	0.000542058	1844.82	30.747
0.936968	0.629921	0.046729		55	40	5		0	#DIV/0!		#DIV/0!	#DIV/0!		5.15742	0.0853988	5.15742	0.0853988	5.24282	257.413	4.29022		5.82036		7.2472	5.82036	320.12	0.0155078	64.4838	1.07473
0.851789	0.629921	0.0934579		50	40	10		0	#DIV/0!		#DIV/0!	#DIV/0!		5.15742	0.466657	5.15742	0.466657	5.62408	282.133	4.70221		5.97375		7.58195	5.97375	298.688	0.0133788	74.7452	1.24575
0.76661	0.629921	0.140187		45	40	15		0	#DIV/0!		#DIV/0!	#DIV/0!		5.15742	1.7287	5.15742	1.7287	6.88612	309.779	5.16299		6.99816		8.856	6.99816	314.917	0.0125311	79.8017	1.33003
0.681431	0.629921	0.186916		40	40	20		0	#DIV/0!		#DIV/0!	#DIV/0!		5.15742	4.52422	5.15742	4.52422	9.68164	339.619	5.66032		9.93823		12.1611	9.93823	397.529	0.0133565	74.87	1.24783
0.596252	0.629921	0.233645		35	40	25		0	#DIV/0!		#DIV/0!	#DIV/0!		5.15742	8.71757	5.15742	8.71757	13.875	373.844	6.23073		14.4031		17.2088	17.2088	602.307	0.0164971	60.6165	1.01028
0.511073	0.629921	0.280374		30	40	30		0	#DIV/0!		#DIV/0!	#DIV/0!		5.15742	12.8884	5.15742	12.8884	18.0458	420.741	7.01234		18.3991		22.2742	22.2742	668.226	0.0154676	64.6511	1.07752
0.425894	0.629921	0.327103		25	40	35		0	#DIV/0!		#DIV/0!	#DIV/0!		5.15742	15.2364	5.15742	15.2364	20.3939	495.042	8.2507		20.3117		26.7349	26.7349	668.373	0.0128922	77.5665	1.29277
0.340716	0.629921	0.373832		20	40	40		0	#DIV/0!		#DIV/0!	#DIV/0!		5.15742	15.0097	5.15742	15.0097	20.1671	619.97	10.3328		19.981		37.6163	37.6163	752.326	0.0114406	87.4079	1.4568
0.255537	0.629921	0.420561		15	40	45		0	#DIV/0!		#DIV/0!	#DIV/0!		5.15742	12.8408	5.15742	12.8408	17.9982	841.821	14.0303		18.1837		48.3136	48.3136	724.704	0.00830239	120.447	2.00745
0.170358	0.629921	0.46729		10	40	50		0	#DIV/0!		#DIV/0!	#DIV/0!		5.15742	9.94185	5.15742	9.94185	15.0993	1294.53	21.5756		15.8137		24.625	24.625	246.25	0.00232383	430.325	7.17208
0.0851789	0.629921	0.514019		5	40	55		0	#DIV/0!		#DIV/0!	#DIV/0!		5.15742	7.25982	5.15742	7.25982	12.4172	2650.84	44.1807		13.4827		14.7346	14.7346	73.6729	0.000582795	1715.87	28.5978
0.76661	0.787402	0.046729		45	50	5		0	#DIV/0!		#DIV/0!	#DIV/0!		3.04527	0.0853988	3.04527	0.0853988	3.13067	321.06	5.351		3.47888		5.33671	3.47888	156.549	0.00774814	129.063	2.15105
0.681431	0.787402	0.0934579		40	50	10		0	#DIV/0!		#DIV/0!	#DIV/0!		3.04527	0.466657	3.04527	0.466657	3.51193	359.862	5.9977		3.63554		5.85844	3.63554	145.422	0.0065885	151.78	2.52966
0.596252	0.787402	0.140187		35	50	15		0	#DIV/0!		#DIV/0!	#DIV/0!		3.04527	1.7287	3.04527	1.7287	4.77397	406.317	6.77195		4.68179		7.48743	7.48743	262.06	0.00850477	117.581	1.95969
0.511073	0.787402	0.186916		30	50	20		0	#DIV/0!		#DIV/0!	#DIV/0!		3.04527	4.52422	3.04527	4.52422	7.56949	461.717	7.69528		7.68454		11.5597	11.5597	346.791	0.00899579	111.163	1.85272
0.425894	0.787402	0.233645		25	50	25		0	#DIV/0!		#DIV/0!	#DIV/0!		3.04527	8.71757	3.04527	8.71757	11.7628	533.272	8.88787		12.2446		18.6678	18.6678	466.696	0.00950832	105.171	1.75285
0.340716	0.787402	0.280374		20	50	30		0	#DIV/0!		#DIV/0!	#DIV/0!		3.04527	12.8884	3.04527	12.8884	15.9337	642.609	10.7101		16.3258		33.961	33.961	679.221	0.0104593	95.6084	1.59347
0.255537	0.787402	0.327103		15	50	35		0	#DIV/0!		#DIV/0!	#DIV/0!		3.04527	15.2364	3.04527	15.2364	18.2817	839.803	13.9967		18.2792		48.4091	48.4091	726.137	0.00831681	120.238	2.00397
0.170358	0.787402	0.373832		10	50	40		0	#DIV/0!		#DIV/0!	#DIV/0!		3.04527	15.0097	3.04527	15.0097	18.055	1262.12	21.0354		17.9414		26.7527	26.7527	267.527	0.00246663	405.412	6.75686
0.0851789	0.787402	0.420561		5	50	45		0	#DIV/0!		#DIV/0!	#DIV/0!		3.04527	12.8408	3.04527	12.8408	15.886	2571.49	42.8582		16.1058		17.3577	17.3577	86.7885	0.000626807	1595.39	26.5898
0.596252	0.944882	0.046729		35	60	5		0	#DIV/0!		#DIV/0!	#DIV/0!		1.92907	0.0853988	1.92907	0.0853988	2.01447	417.308	6.95513		1.7928		4.59844	4.59844	160.946	0.00612959	163.143	2.71905
0.511073	0.944882	0.0934579		30	60	10		0	#DIV/0!		#DIV/0!	#DIV/0!		1.92907	0.466657	1.92907	0.466657	2.39573	485.046	8.0841		1.95182		5.82697	5.82697	174.809	0.00553307	180.732	3.01219
0.425894	0.944882	0.140187		25	60	15		0	#DIV/0!		#DIV/0!	#DIV/0!		1.92907	1.7287	1.92907	1.7287	3.65777	574.969	9.58282		3.0138		9.43699	9.43699	235.925	0.00563632	177.421	2.95701
0.340716	0.944882	0.186916		20	60	20		0	#DIV/0!		#DIV/0!	#DIV/0!		1.92907	4.52422	1.92907	4.52422	6.45329	699.837	11.664		6.06169		23.697	23.697	473.939	0.00770388	129.805	2.16341
0.255537	0.944882	0.233645		15	60	25		0	#DIV/0!		#DIV/0!	#DIV/0!		1.92907	8.71757	1.92907	8.71757	10.6466	897.753	14.9625		10.6903		40.8202	40.8202	612.303	0.00717084	139.454	2.32423
0.170358	0.944882	0.280374		10	60	30		0	#DIV/0!		#DIV/0!	#DIV/0!		1.92907	12.8884	1.92907	12.8884	14.8175	1297.71	21.6285		14.8328		23.6441	23.6441	236.441	0.00225799	442.871	7.38119
0.0851789	0.944882	0.327103		5	60	35		0	#DIV/0!		#DIV/0!	#DIV/0!		1.92907	15.2364	1.92907	15.2364	17.1655	2543.41	42.3902		16.8156		18.0675	18.0675	90.3374	0.000638716	1565.64	26.094
0.425894	1.10236	0.046729		25	70	5		0	#DIV/0!		#DIV/0!	#DIV/0!		1.32483	0.0853988	1.32483	0.0853988	1.41023	587.712	9.7952		0.865457		7.28865	7.28865	182.216	0.00473517	211.186	3.51976
0.340716	1.10236	0.0934579		20	70	10		0	#DIV/0!		#DIV/0!	#DIV/0!		1.32483	0.466657	1.32483	0.466657	1.79149	731.888	12.1981		1.02577		18.661	18.661	373.221	0.00635196	157.432	2.62386
0.255537	1.10236	0.140187		15	70	15		0	#DIV/0!		#DIV/0!	#DIV/0!		1.32483	1.7287	1.32483	1.7287	3.05354	963.9	16.065		2.0964		32.2263	32.2263	483.394	0.0058731	170.268	2.8378
0.170358	1.10236	0.186916		10	70	20		0	#DIV/0!		#DIV/0!	#DIV/0!		1.32483	4.52422	1.32483	4.52422	5.84906	1407.66	23.4611		5.16911		13.9804	13.9804	139.804	0.00160942	621.34	10.3557
0.0851789	1.10236	0.233645		5	70	25		0	#DIV/0!		#DIV/0!	#DIV/0!		1.32483	8.71757	1.32483	8.71757	10.0424	2708.05	45.1341		9.83546		11.0873	11.0873	55.4366	0.000521599	1917.18	31.953
0.255537	1.25984	0.046729		15	80	5		0	#DIV/0!		#DIV/0!	#DIV/0!		0.967255	0.0853988	0.967255	0.0853988	1.05265	982.986	16.3831		0.407334		30.5372	30.5372	458.058	0.00561804	177.998	2.96663
0.170358	1.25984	0.0934579		10	80	10		0	#DIV/0!		#DIV/0!	#DIV/0!		0.967255	0.466657	0.967255	0.466657	1.43391	1468.94	24.4823		0.568288		9.37959	9.37959	93.7959	0.00130064	768.85	12.8142
0.0851789	1.25984	0.140187		5	80	15		0	#DIV/0!		#DIV/0!	#DIV/0!		0.967255	1.7287	0.967255	1.7287	2.69596	2901.77	48.3628		1.64319		2.89505	2.89505	14.4752	0.000384145	2603.18	43.3864
1	1	1		25.6108	27.7051	46.6841		0	#DIV/0!		#DIV/0!	#DIV/0!		6.74156	11.8881	6.74156	11.8881	18.6296	490.422	8.17369		18.2424		24.1834	24.1834	619.357	0.0123647	80.8757	1.34793
